# Supplementary material for: Systems consequences of amplicon formation in human breast cancer
Source: HighWire-hosted journal article supplement (doi:10.1101/gr.164871.113), 2014-09-03
Supplement: Supplemental_Material.pdf [file Supplemental_Material.pdf]

## **Supplemental information**

### **Systems consequences of amplicon formation in human breast cancer**

Inaki K. et al.

Supplemental Tables

Supplemental Figures

Supplemental Methods

Supplemental Results

Supplemental References

| Clinical Data |                       |             |                |              | Copy number ratio (mutation <sup>(1)</sup> ) |       |       | ERBB2 Gene expression <sup>(2)</sup> |             |
|---------------|-----------------------|-------------|----------------|--------------|----------------------------------------------|-------|-------|--------------------------------------|-------------|
| Sample ID     | Breast Cancer Subtype | Tumor Grade | Clinical Stage | TNM          | TP53                                         | BRCA1 | ERBB2 | RNAseq-based                         | Array-based |
| BT47          | Luminal B             | II          | IIA            | pT2 pN0 M0   | 0.76 (WT)                                    | 0.78  | 11.96 | na                                   | <b>1.79</b> |
| BT55          | Luminal B             | III         | I              | pT1c pN0 M0  | 0.74 (WT)                                    | 0.76  | 6.92  | <b>5.3</b>                           | na          |
| BT58          | ERBB2                 | I           | IIA            | T1c N0 M0    | 0.96 (na)                                    | 0.98  | 3.52  | na                                   | <b>1.71</b> |
| BT71          | Luminal A             | II          | IIIA           | pT1c pN2 M0  | 0.77 (na)                                    | 0.8   | 1.42  | na                                   | <b>1.5</b>  |
| BT73          | Luminal B             | II          | IIA            | pT1c pN2 M0  | 0.61 (I195T)                                 | 0.61  | 1.45  | <b>4.2</b>                           | na          |
| BT122         | TNB                   | III         | IIA            | pT1c pN1a M0 | 0.58 (G245S)                                 | 0.59  | 0.59  | <b>2.71</b>                          | na          |
| BT146         | ERBB2                 | II          | IIB            | pT2 pN1a M0  | 0.73 (K132N)                                 | 0.69  | 13.09 | <b>7.13</b>                          | na          |
| BT191         | ERBB2                 | II          | IIB            | T2 N1 MX     | 0.69 (WT)                                    | 0.69  | 10.90 | na                                   | <b>1.82</b> |

**Supplemental Table 1. Clinical and molecular attributes of the eight sequenced breast tumor samples**

TNB, Triple Negative Breast cancer; WT, wild type.

<sup>(1)</sup> Based on previously published data (Banerji et al. 2012)

<sup>(2)</sup> Log2 Ratio vs per-sample median expression value

| SampleID | Origin                       | Library preparation <sup>(1)</sup> | Sequencing Platform    | Physical Coverage <sup>(2)</sup> | No. somatic SVs <sup>(3)</sup> |
|----------|------------------------------|------------------------------------|------------------------|----------------------------------|--------------------------------|
| BT47     | Tumor                        | Nextera Mate Pair library prep     | Illumina HiSeq 2500    | 25                               | 150                            |
| BT47_N   | Peripheral Blood Lymphocytes | Nextera Mate Pair library prep     | Illumina HiSeq 2500    | 128                              | na                             |
| BT55     | Tumor                        | DNA-PET library prep               | AB SOLiD 3 Plus System | 131                              | 381                            |
| BT55_N   | Peripheral Blood Lymphocytes | DNA-PET library prep               | AB SOLiD 3 Plus System | 117                              | na                             |
| BT58     | Tumor                        | Nextera Mate Pair library prep     | Illumina HiSeq 2500    | 59                               | 89                             |
| BT58_N   | Peripheral Blood Lymphocytes | Nextera Mate Pair library prep     | Illumina HiSeq 2500    | 209                              | na                             |
| BT71     | Tumor                        | Nextera Mate Pair library prep     | Illumina HiSeq 2500    | 181                              | 386                            |
| BT71_N   | Peripheral Blood Lymphocytes | Nextera Mate Pair library prep     | Illumina HiSeq 2500    | 199                              | na                             |
| BT73     | Tumor                        | DNA-PET library prep               | AB SOLiD 4 System      | 165                              | 362                            |
| BT73_N   | Peripheral Blood Lymphocytes | DNA-PET library prep               | AB SOLiD 4 System      | 128                              | na                             |
| BT122    | Tumor                        | DNA-PET library prep               | AB SOLiD 3 Plus System | 222                              | 390                            |
| BT122_N  | Peripheral Blood Lymphocytes | DNA-PET library prep               | AB SOLiD 3 Plus System | 252                              | na                             |
| BT146    | Tumor                        | DNA-PET library prep               | AB SOLiD 3 Plus System | 294                              | 296                            |
| BT146_N  | Peripheral Blood Lymphocytes | DNA-PET library prep               | AB SOLiD 3 Plus System | 308                              | na                             |
| BT191    | Tumor                        | Nextera Mate Pair library prep     | Illumina HiSeq 2500    | 111                              | 322                            |
| BT191_N  | Peripheral Blood Lymphocytes | Nextera Mate Pair library prep     | Illumina HiSeq 2500    | 196                              | na                             |

Supplemental Table 2. DNA sequencing statistics

<sup>(1)</sup>described in Supplemental Methods  
<sup>(2)</sup>(number of non redundant concordant mate pair reads \* Median library span)/bps of mappable genome  
<sup>(3)</sup>Structural Variations (SVs) of support ≥ 6 for samples sequenced on a SOLiD platform, ≥ 10 for samples sequenced on Illumina HiSeq 2500

| SampleID | No. mapped reads | No. uniquely mapped reads (%) |
|----------|------------------|-------------------------------|
| BT55     | 65,942,980       | 46,901,945 (71.1%)            |
| BT73     | 67,845,400       | 43,592,403 (64.3%)            |
| BT122    | 70,187,839       | 52,360,392 (74.6%)            |
| BT146    | 63,457,125       | 45,931,897 (72.4%)            |

Supplemental Table 3. RNA sequencing statistics

|                             | NUMBER (PERCENTAGE) |                  |                 |                  |                  |                  |                  |                  |
|-----------------------------|---------------------|------------------|-----------------|------------------|------------------|------------------|------------------|------------------|
|                             | T47                 | BT55             | T58             | T71              | BT73             | BT122            | BT146            | T191             |
| Deletion                    | 15 (10)             | 49 (12.9)        | 12 (13.48)      | 34 (8.81)        | 45 (12.4)        | 23 (5.9)         | 42 (14.2)        | 25 (7.76)        |
| Tandem duplication          | 21 (14)             | 32 (8.4)         | 10 (11.24)      | 38 (9.84)        | 39 (10.8)        | 287 (73.6)       | 24 (8.1)         | 61 (18.94)       |
| Unpaired inversion          | 45 (30)             | 89 (23.4)        | 17 (19.1)       | 84 (21.76)       | 67 (18.5)        | 33 (8.5)         | 55 (18.6)        | 135 (41.93)      |
| Inversion                   | 0 (0)               | 2 (0.5)          | 0 (0)           | 0 (0)            | 0 (0)            | 0 (0)            | 2 (0.7)          | 0 (0)            |
| Intra-chromosomal insertion | 3 (2)               | 7 (1.8)          | 0 (0)           | 7 (1.81)         | 4 (1.1)          | 2 (0.5)          | 0 (0)            | 13 (4.04)        |
| Inter-chromosomal insertion | 0 (0)               | 5 (1.3)          | 1 (1.12)        | 0 (0)            | 0 (0)            | 0 (0)            | 0 (0)            | 0 (0)            |
| Isolated translocation      | 29 (19.33)          | 91 (23.9)        | 38 (42.7)       | 74 (19.17)       | 47 (13)          | 26 (6.7)         | 42 (14.2)        | 52 (16.15)       |
| Balanced translocation      | 0 (0)               | 0 (0)            | 0 (0)           | 0 (0)            | 0 (0)            | 0 (0)            | 0 (0)            | 0 (0)            |
| Intra-chromosomal complex   | 21 (14)             | 62 (16.3)        | 4 (4.49)        | 85 (22.02)       | 136 (37.6)       | 11 (2.8)         | 117 (39.5)       | 20 (6.21)        |
| Inter-chromosomal complex   | 16 (10.67)          | 44 (11.5)        | 7 (7.87)        | 64 (16.58)       | 24 (6.6)         | 8 (2.1)          | 14 (4.7)         | 16 (4.97)        |
| <b>Total</b>                | <b>150 (100)</b>    | <b>381 (100)</b> | <b>89 (100)</b> | <b>386 (100)</b> | <b>362 (100)</b> | <b>390 (100)</b> | <b>296 (100)</b> | <b>322 (100)</b> |

**Supplemental Table 4. Number and percentage of the different types of somatic structural variations detected in the eight sequenced breast tumors**

| Number (percentage) |             |               |               |                          |                   |                   |                  |
|---------------------|-------------|---------------|---------------|--------------------------|-------------------|-------------------|------------------|
|                     | Fusion Gene | 3' Truncation | 5' Truncation | Intragenic Rearrangement | Intergenic        | Total Intragenic  | Total            |
| <b>BT55</b>         | 30 (7.9)    | 89 (23.4)     | 104 (27.3)    | 5 (1.3)                  | <b>153 (40.2)</b> | <b>228 (59.8)</b> | <b>362 (100)</b> |
| <b>BT73</b>         | 42 (11.6)   | 90 (24.9)     | 77 (21.3)     | 15 (4.1)                 | <b>138 (38.1)</b> | <b>224 (61.9)</b> | <b>381 (100)</b> |
| <b>BT122</b>        | 39 (10)     | 74 (19)       | 106 (27.2)    | 31 (7.9)                 | <b>140 (35.9)</b> | <b>250 (64.1)</b> | <b>296 (100)</b> |
| <b>BT146</b>        | 30 (10.1)   | 83 (28)       | 89 (30.1)     | 7 (2.4)                  | <b>87 (29.4)</b>  | <b>209 (70.6)</b> | <b>390 (100)</b> |

**Supplemental Table 5. Number and percentage of somatic structural variations which caused gene fusions, truncations or intragenic rearrangements in the four breast tumors examined using DNA-PET. The numbers presented here are based on the analysis of DNA sequencing data.**



|       | SM                 | 5' gene      | 5' chr | 3' gene | 3' chr | Fused exons              | Frame               | 5' domain (Pfam)                                 | 3' domain (Pfam)                                                                           |
|-------|--------------------|--------------|--------|---------|--------|--------------------------|---------------------|--------------------------------------------------|--------------------------------------------------------------------------------------------|
| BT55  | Del                | MYH9         | Chr 22 | TTC28   | Chr 22 | E22-E14                  | Out                 | Myosin_N, Myosin_head, IQ                        | None                                                                                       |
|       |                    | CTTN         | Chr 11 | RBM4    | Chr 11 | E17-E3                   | In                  | HS1_rep, SH3_1 / SH3_2 (truncated)               | RRM_1 (truncated), zf-CCHC                                                                 |
|       | TD                 | AATF         | Chr 17 | KSR1    | Chr 17 | E5/ins/mid of E17        | Out                 |                                                  |                                                                                            |
|       |                    |              |        |         |        | E5/E17                   | In                  | None                                             | Pkinase / Pkinase_Tyr (truncated)                                                          |
|       |                    |              |        |         |        | E4/E17                   | Out                 |                                                  |                                                                                            |
| BT146 | U-Inv              | CABIN1       | Chr 22 | BRD1    | Chr 22 | E1-E2                    | 5'UTR of 5' gene    | None                                             | Bromodomain, PWWP                                                                          |
|       |                    | DES1         | Chr 22 | EIF3L   | Chr 22 | E1-E13                   | Out                 | DUF862 (truncated)                               | None                                                                                       |
|       | Inter-Ins          | RBFOX2       | Chr 11 | MAP6    | Chr 11 | E4-E2                    | Out                 | None                                             | STOP (truncated)                                                                           |
|       |                    | ASB3         | Chr 2  | NRXN1   | Chr 2  | E1-E12                   | 5'UTR of 5' gene    | None                                             | Laminin_G_1 / Laminin_G_2 (truncated)                                                      |
|       | Del                | ZMAT3        | Chr 3  | PLCH1   | Chr 3  | E1-E3                    | 5'UTR of 5' gene    | None                                             | efhand_like, PI-PLC-X, PI-PLC-Y, C2                                                        |
| BT122 |                    | FAM107B      | Chr 10 | FRMD4A  | Chr 10 | E3-E3                    | Out                 | DUF1151 (truncated)                              | FERM_N, FERM_M, FERM_C, DUF3338                                                            |
|       |                    |              |        |         |        | E3-(intron+)E3           | Out                 |                                                  |                                                                                            |
|       | U-Inv              | CPT1A        | Chr 11 | FAM111B | Chr 11 | E13-E4                   | 5'UTR of 3' gene    | Carn_acyltransf (truncated)                      | None                                                                                       |
|       |                    | LRRC27       | Chr 10 | UROS    | Chr 10 | E13(+intron)-E4          | 5'UTR of 3' gene    | LRR_1                                            | HEM4                                                                                       |
|       |                    | USP6NL       | Chr 10 | GALNTL6 | Chr 4  | E2-E3                    | Out                 | None                                             | Glycos_transf_2, Ricin_B_lectin                                                            |
| BT122 | Transloc           | MYPOP        | Chr 19 | COL14A1 | Chr 8  | E1-E3                    | 5'UTR of 5' gene    | None                                             | fn3 / VWA (truncated), Collagen                                                            |
|       | Complex-Intra (TD) | MSI2         | Chr 17 | UBE2Z   | Chr 17 | E2/E15                   | Out                 | None                                             |                                                                                            |
|       |                    |              |        |         |        | E7-E6                    | Out                 |                                                  |                                                                                            |
|       |                    |              |        |         |        | E7-E5 (extendend to 5')  | Out                 | RRM_1 (truncated)                                | UQ_con (truncated)                                                                         |
|       |                    |              |        |         |        | E6-E6                    | Out                 |                                                  |                                                                                            |
| BT122 | Del                | SKI          | Chr 1  | MACF1   | Chr 1  | E1-E2                    | Out                 |                                                  | CH, CAMSAP_CH, Spectrin, GAS2                                                              |
|       |                    |              |        |         |        | E1(+intron)-(intron+)E2  | Out                 | Ski_Sno, c-SKI_SMAD_bind                         | CH (truncated), CAMSAP_CH, Spectrin, GAS2                                                  |
|       |                    |              |        |         |        | E1-E3                    | In                  |                                                  |                                                                                            |
|       |                    | TOR1AIP2     | Chr 1  | ACBD6   | Chr 1  | E2-E8                    | 5'UTR of 5' gene    | None                                             | Ank (truncated)                                                                            |
|       |                    |              |        |         |        | E2-(intron+)E8           |                     |                                                  |                                                                                            |
| BT122 |                    | MAP4         | Chr 3  | COL7A1  | Chr 3  | E2-E14                   | In                  |                                                  |                                                                                            |
|       |                    |              |        |         |        | E2-E15                   | In                  | None                                             | VWA / fn3 (truncated), Collagen, Kunitz_BPTI                                               |
|       |                    |              |        |         |        | E2(+intron)-E14          | In                  |                                                  |                                                                                            |
|       |                    | FAM13A       | Chr 4  | SNCA    | Chr 4  | E2(+intron)-E14          | Out                 |                                                  |                                                                                            |
|       |                    | IL6ST        | Chr 5  | ANKRD55 | Chr 5  | E20-E6                   | In                  | RhoGAP                                           | Synuclein (truncated)                                                                      |
| BT122 |                    | STYXL1       | Chr 7  | YWHAG   | Chr 7  | E15-E8                   | Out                 | Lep_receptor_lg, EpoR_lig-bind / IL6Ra-bind, fn3 | Ank (truncated)                                                                            |
|       |                    | DCAF10       | Chr 9  | ZCCHC7  | Chr 9  | E4-E2                    | Out                 | Rhodanese (truncated), DSPc                      | 14-3-3 (truncated)                                                                         |
|       |                    | PPP6C        | Chr 9  | MAPKAP1 | Chr 9  | E2-E6                    | Out                 | WD40 (truncated)                                 | zf-CCHC (truncated)                                                                        |
|       | TD                 | DDX50        | Chr 10 | CCAR1   | Chr 10 | E1-E2                    | 5'UTR of 3' gene    | None                                             | SIN1                                                                                       |
|       |                    |              |        |         |        | E6-E16                   | Out                 |                                                  |                                                                                            |
| BT122 |                    |              |        |         |        | E7-E16                   | In                  | ResIII, DEAD                                     | SAP (truncated)                                                                            |
|       |                    |              |        |         |        | E1b-E3                   |                     |                                                  |                                                                                            |
|       |                    | FAM222B      | Chr 17 | SSH2    | Chr 17 | E1b(+intron)-E3          | 5'UTR of 5' gene    | None                                             | DEK_C, DSPc                                                                                |
|       |                    |              |        |         |        | E1b(+intron)-(intron+)E3 |                     |                                                  |                                                                                            |
|       |                    | FBF1         | Chr 17 | SRP68   | Chr 17 | E7-E9                    | Out                 | None                                             | None                                                                                       |
| BT122 |                    | FDXR         | Chr 17 | SRP68   | Chr 17 | E2-E5                    | In                  | Pyr_redox_2 (truncated)                          | None                                                                                       |
|       |                    | KIAA1328     | Chr 18 | ELP2    | Chr 18 | E4-E6                    | Out                 | None                                             | WD40 (truncated)                                                                           |
|       |                    | ELAVL1       | Chr 19 | FBN3    | Chr 19 | E4-E8                    | Out                 |                                                  |                                                                                            |
|       |                    |              |        |         |        | E4(+intron)-E22          | Out                 | RRM_1 (truncated)                                | EGF_CA / TB (truncated)                                                                    |
|       |                    | LOC100131691 | Chr 19 | ZSWIM4  | Chr 19 | E1-E10                   |                     |                                                  |                                                                                            |
| BT122 |                    |              |        |         |        | E1-E12                   | 5'gene = non-coding | None                                             | None                                                                                       |
|       |                    | RALY         | Chr 20 | CBFA2T2 | Chr 20 | E2-E11                   | 5'UTR of 5' gene    | None                                             | zf-MYND                                                                                    |
|       |                    | MED8         | Chr 1  | CDC20   | Chr 1  | E5-mid of E4             | Out                 | Med8 (truncated)                                 | WD40                                                                                       |
|       |                    | RNF214       | Chr 11 | SIK3    | Chr 11 | E5-E5                    | Out                 | None                                             | Pkinase / Pkinase_Tyr (truncated)                                                          |
|       | U-Inv              |              |        |         |        | E9-mid of E15            | In                  |                                                  |                                                                                            |
| BT122 |                    | TP53         | Chr 17 | POLR2A  | Chr 17 |                          |                     | P53, P53_tetramer (truncated)                    | RNA_pol_Rpb1_4 (truncated), RNA_pol_Rpb1_5, RNA_pol_Rpb1_6, RNA_pol_Rpb1_7, RNA_pol_Rpb1_R |
|       |                    |              |        |         |        | E10a-mid of E15          | Out                 |                                                  |                                                                                            |
|       |                    | ZNF740       | Chr 3  | RASSF1  | Chr 12 | E6-E8                    | In                  | zf-C2H2                                          | None                                                                                       |
|       |                    | ATAD2        | Chr 8  | BFAR    | Chr 16 | E20-E6                   | Out                 | AAA, Bromodomain (truncated)                     | None                                                                                       |
|       | Transloc           | SMARCA4      | Chr 10 | CHST15  | Chr 19 | E21-E6                   | In                  |                                                  |                                                                                            |
| BT122 |                    |              |        |         |        | E30-E2                   |                     |                                                  |                                                                                            |
|       |                    |              |        |         |        | E30-(intron+)E2          | 5'UTR of 3' gene    | QLQ, HAS, BRK, SNF2_N, Helicase_C                | Sulfotransfer_1                                                                            |
|       |                    | RSU1         | Chr 10 | ROBO3   | Chr 11 | E2-E20                   | Out                 | None                                             | None                                                                                       |
|       |                    |              |        |         |        | E2-insertion(chr11)-E18  | Out                 |                                                  |                                                                                            |

Supplemental Table 6. List of the 37 fusion gene transcripts detected by RT-PCR

| ID | SV Type | ChrL   | Left BP: Median <sup>1</sup> | Left BP: SD <sup>1</sup> | StrandL | ChrR   | Right BP: Median <sup>1</sup> | Right BP: SD <sup>1</sup> | StrandR | Span: Median <sup>2</sup> | Span:SD <sup>2</sup> | No SVs <sup>3</sup> | Samples (Highest Cluster Size) <sup>4</sup> | Consequence                                            |
|----|---------|--------|------------------------------|--------------------------|---------|--------|-------------------------------|---------------------------|---------|---------------------------|----------------------|---------------------|---------------------------------------------|--------------------------------------------------------|
| 1  | DEL     | Chr 17 | 35,327,718                   | 901,170                  | +       | Chr 17 | 44,040,832                    | 1,555,393                 | +       | 9,229,089                 | 1,956,113            | 11                  | BT47(53); BT55(51); BT58(28); BT146(285)    | Loss of the <i>BRCA1</i> locus                         |
| 2  | DEL     | Chr 17 | 26,477,558                   | 365,257                  | +       | Chr 17 | 53,167,545                    | 1,642,549                 | +       | 26,689,987                | 1,277,292            | 2                   | BT47(13); BT55(22)                          |                                                        |
| 3  | DEL     | Chr 17 | 44,577,064                   | 529,252                  | +       | Chr 17 | 47,997,384                    | 554,462                   | +       | 3,420,320                 | 25,210               | 2                   | BT47(12); BT55(126)                         |                                                        |
| 4  | TD      | Chr 17 | 43,382,084                   | 702,632                  | +       | Chr 17 | 33,466,706                    | 242,212                   | +       | 9,915,378                 | 460,419              | 2                   | BT146(11); BT191(15)                        |                                                        |
| 5  | TD      | Chr 3  | 187,084,139                  | 242,560                  | +       | Chr 3  | 130,357,857                   | 264,454                   | +       | 56,726,282                | 21,893               | 2                   | BT146(56); BT191(66)                        |                                                        |
| 6  | TD      | Chr 17 | 35,484,752                   | 502,337                  | +       | Chr 17 | 32,471,649                    | 2,890,927                 | +       | 3,140,266                 | 2,578,085            | 8                   | BT55(49); BT71(141); BT73(44); BT146(359)   | Gain of <i>ERBB2</i>                                   |
| 7  | TD      | Chr 17 | 48,761,811                   | 343,544                  | +       | Chr 17 | 35,187,023                    | 138,359                   | +       | 13,574,789                | 481,902              | 2                   | BT47(45); BT55(58)                          |                                                        |
| 8  | TD      | Chr 1  | 13,598,917                   | 39,324                   | +       | Chr 1  | 13,372,169                    | 39,878                    | +       | 226,748                   | 554                  | 2                   | BT47(10); BT191(11)                         |                                                        |
| 9  | TD      | Chr 1  | 146,015,135                  | 35,645                   | +       | Chr 1  | 144,709,478                   | 35,995                    | +       | 1,305,554                 | 646                  | 3                   | BT47(11); BT191(11)                         |                                                        |
| 10 | TD      | Chr 17 | 35,511,432                   | 35,780                   | +       | Chr 17 | 35,114,153                    | 93,482                    | +       | 397,871                   | 57,705               | 3                   | BT55(207); BT191(625)                       | Gain of <i>ERBB2</i>                                   |
| 11 | TD      | Chr 17 | 48,218,299                   | 1,919,047                | +       | Chr 17 | 19,265,756                    | 1,656,736                 | +       | 28,952,543                | 3,575,783            | 2                   | BT47(10); BT55(124)                         | 17q21.3 amplification                                  |
| 12 | TD      | Chr 11 | 62,009,478                   | 147,749                  | +       | Chr 11 | 61,632,172                    | 33,204                    | +       | 377,306                   | 114,545              | 2                   | BT73(6); BT122(11)                          |                                                        |
| 13 | TD      | Chr 16 | 18,112,266                   | 34,249                   | +       | Chr 16 | 15,195,421                    | 39,056                    | +       | 2,916,846                 | 4,806                | 2                   | BT58(10); BT191(14)                         |                                                        |
| 14 | TD      | Chr 10 | 88,893,085                   | 35,442                   | +       | Chr 10 | 46,306,886                    | 39,748                    | +       | 42,586,199                | 4,306                | 2                   | BT71(11); BT191(11)                         |                                                        |
| 15 | TD      | Chr 11 | 12,498,043                   | 1,801,332                | +       | Chr 11 | 6,614,704                     | 1,267,526                 | +       | 5,883,339                 | 533,806              | 2                   | BT71(27); BT73(34)                          |                                                        |
| 16 | INV     | Chr 17 | 43,485,798                   | 891,783                  | +       | Chr 17 | 46,036,716                    | 562,884                   | -       | 3,493,024                 | 830,501              | 3                   | BT55(189); BT71(14)                         |                                                        |
| 17 | INV     | Chr 17 | 35,336,616                   | 1,303,691                | +       | Chr 17 | 45,874,398                    | 2,065,841                 | -       | 10,957,045                | 2,264,413            | 6                   | BT47(43); BT55(75); BT58(10); BT146(88)     | Co-amplification of <i>ERBB2</i> and 17q21.3 amplicons |
| 18 | INV     | Chr 17 | 34,388,439                   | 1,216,754                | -       | Chr 17 | 44,664,869                    | 2,226,404                 | +       | 9,990,810                 | 1,870,681            | 8                   | BT47(42); BT55(331); BT71(12); BT146(852)   | Co-amplification of <i>ERBB2</i> and 17q21.3 amplicons |
| 19 | INV     | Chr 2  | 109,922,834                  | 42,154                   | -       | Chr 2  | 111,030,974                   | 185,568                   | +       | 1,108,140                 | 225,167              | 6                   | BT47(11); BT71(10); BT191(13)               |                                                        |
| 20 | INV     | Chr 7  | 149,443,301                  | 151,750                  | -       | Chr 7  | 153,238,864                   | 218,928                   | +       | 3,795,563                 | 370,558              | 6                   | BT71(11); BT191(11)                         |                                                        |
| 21 | INV     | Chr 16 | 16,276,197                   | 600,804                  | -       | Chr 16 | 18,403,415                    | 127,326                   | +       | 2,154,658                 | 653,012              | 6                   | BT71(12); BT191(20)                         |                                                        |
| 22 | INV     | Chr 7  | 56,865,867                   | 144,479                  | -       | Chr 7  | 62,839,319                    | 124,243                   | +       | 5,973,452                 | 268,701              | 3                   | BT47(12); BT71(12)                          |                                                        |
| 23 | INV     | Chr 3  | 130,546,270                  | 206,557                  | +       | Chr 3  | 186,945,403                   | 1,628,443                 | -       | 56,667,233                | 1,776,278            | 3                   | BT146(46); BT191(89)                        |                                                        |
| 24 | INV     | Chr 7  | 66,329,672                   | 81,827                   | -       | Chr 7  | 71,789,290                    | 147,033                   | +       | 5,567,923                 | 131,645              | 3                   | BT71(11); BT191(12)                         |                                                        |
| 25 | INV     | Chr 17 | 48,259,177                   | 184,392                  | -       | Chr 17 | 68,990,010                    | 1,650,813                 | +       | 20,733,827                | 1,466,428            | 3                   | BT47(27); BT146(35)                         |                                                        |
| 26 | INV     | Chr 15 | 80,407,106                   | 225,677                  | -       | Chr 15 | 83,597,596                    | 560,427                   | +       | 3,190,490                 | 786,094              | 3                   | BT71(10); BT191(18)                         |                                                        |
| 27 | INV     | Chr 17 | 14,998,735                   | 525,647                  | -       | Chr 17 | 19,088,765                    | 616,620                   | +       | 4,090,031                 | 1,142,267            | 2                   | BT71(11); BT146(11)                         |                                                        |
| 28 | INV     | Chr 17 | 46,780,169                   | 18,938                   | +       | Chr 17 | 48,815,995                    | 141,184                   | -       | 2,035,826                 | 122,247              | 2                   | BT47(21); BT55(23)                          |                                                        |
| 29 | INV     | Chr 3  | 130,301,332                  | 207,504                  | -       | Chr 3  | 137,442,289                   | 1,303,769                 | +       | 7,140,958                 | 1,511,273            | 2                   | BT73(32); BT191(29)                         |                                                        |
| 30 | INV     | Chr 17 | 32,025,103                   | 706,304                  | -       | Chr 17 | 33,861,224                    | 366,022                   | +       | 1,836,121                 | 340,282              | 2                   | BT146(9); BT191(14)                         |                                                        |
| 31 | INV     | Chr 5  | 68,989,006                   | 169,133                  | -       | Chr 5  | 70,195,527                    | 310,008                   | +       | 1,206,521                 | 479,141              | 2                   | BT47(12); BT191(11)                         |                                                        |
| 32 | INV     | Chr 9  | 68,304,589                   | 227,677                  | -       | Chr 9  | 70,168,483                    | 57,461                    | +       | 1,863,894                 | 285,138              | 2                   | BT47(13); BT71(10)                          |                                                        |
| 33 | INV     | Chr 16 | 28,273,350                   | 18,978                   | -       | Chr 16 | 28,614,736                    | 61,798                    | +       | 341,386                   | 42,820               | 2                   | BT47(10); BT191(15)                         |                                                        |
| 34 | INV     | Chr 17 | 33,719,586                   | 506,828                  | -       | Chr 17 | 35,186,945                    | 219,338                   | +       | 1,467,359                 | 287,490              | 2                   | BT47(33); BT191(66)                         |                                                        |
| 35 | INV     | Chr 9  | 89,735,239                   | 7,038                    | -       | Chr 9  | 89,920,610                    | 5,434                     | +       | 185,371                   | 12,472               | 2                   | BT71(10); BT191(10)                         |                                                        |
| 36 | INV     | Chr 8  | 60,878,089                   | 291,100                  | -       | Chr 8  | 76,281,297                    | 1,152,573                 | +       | 15,403,209                | 861,473              | 2                   | BT71(46); BT73(108)                         |                                                        |
| 37 | INV     | Chr 8  | 82,011,394                   | 570,480                  | +       | Chr 8  | 86,729,758                    | 1,649,851                 | -       | 4,718,364                 | 2,220,331            | 2                   | BT55(6); BT73(132)                          |                                                        |
| 38 | INTER   | Chr 10 | 39,124,979                   | 1,289,820                | +       | Chr 20 | 29,296,124                    | 2,691                     | -       | NA                        | NA                   | 4                   | BT47(39); BT71(20); BT191(12)               |                                                        |
| 39 | INTER   | Chr 10 | 39,163,542                   | 1,135,045                | -       | Chr 20 | 29,293,988                    | 2,028                     | -       | NA                        | NA                   | 5                   | BT47(13); BT71(35)                          |                                                        |
| 40 | INTER   | Chr 10 | 40,414,572                   | 1,821,801                | +       | Chr 21 | 9,850,007                     | 11,483                    | -       | NA                        | NA                   | 2                   | BT47(38); BT71(15)                          |                                                        |
| 41 | INTER   | Chr 8  | 102,055,262                  | 960,605                  | +       | Chr 12 | 53,859,523                    | 630,340                   | -       | NA                        | NA                   | 2                   | BT73(23); BT191(10)                         |                                                        |
| 42 | INTER   | Chr 13 | 58,728,264                   | 104,773                  | +       | Chr 17 | 45,198,558                    | 2,018,617                 | -       | NA                        | NA                   | 2                   | BT55(35); BT71(43)                          |                                                        |
| 43 | INTER   | Chr 4  | 48,847,023                   | 4,137                    | -       | Chr 20 | 29,293,328                    | 17                        | -       | NA                        | NA                   | 2                   | BT47(14); BT71(13)                          |                                                        |
| 44 | INTER   | Chr 1  | 714,797                      | 2                        | -       | Chr 10 | 41,699,578                    | 428                       | +       | NA                        | NA                   | 2                   | BT71(20); BT191(15)                         |                                                        |
| 45 | INTER   | Chr 11 | 51,424,279                   | 639                      | -       | Chr X  | 61,628,923                    | 57                        | -       | NA                        | NA                   | 2                   | BT71(11); BT191(11)                         |                                                        |

## Supplemental Table 7. List of the recurrent somatic structural variations observed across the eight breast tumors analyzed.

Each row corresponds to a recurrent SV event, as detected based on the analysis of 8 breast cancer samples.

<sup>1</sup> Genomic coordinates for the recurrent event: median and standard deviation values of the left and right break point coordinates correspond to the distributions of the individual SVs comprising the recurrent event.

<sup>2</sup> Median and standard deviation values relative to the span distribution of the individual structural variations comprising the recurrent event.

<sup>3</sup> Number of individual structural variations comprising the recurrent event.

<sup>4</sup> List of the tumor samples contributing to each recurrent event.

In blue: recurrent structural variation events which contribute to Chr 17 oncogenic rearrangements as described in Figure 4 and Supplemental Figure 5.

SV, structural variation; SD, standard deviation; BP, break point; DEL, deletion; TD, tandem duplication; INV, unpaired inversion; INTER, isolated translocation.

|                | CN ratio |       |      |      | Tumorscape <sup>1</sup> <i>ERBB2</i> <sup>+</sup> tumors <sup>2</sup> |         | LSVD <sup>3</sup> | RNA-seq (FPKM) |       |      |      | Number of cohorts | Oncomine <sup>4</sup> |             | Microarray co-expression with <i>ERBB2</i> (P-value, student's t-test) |         |         |         |         |         | KM plotter <sup>5</sup> |         | DMFS    |         | DMFS based on <i>ERBB2</i> status |         |                           |         |     |
|----------------|----------|-------|------|------|-----------------------------------------------------------------------|---------|-------------------|----------------|-------|------|------|-------------------|-----------------------|-------------|------------------------------------------------------------------------|---------|---------|---------|---------|---------|-------------------------|---------|---------|---------|-----------------------------------|---------|---------------------------|---------|-----|
|                | BT122    | BT146 | BT55 | BT73 | CN peak                                                               | CN peak |                   | BT122          | BT146 | BT55 | BT73 |                   | P-value               | Fold change | UPP                                                                    | Van     | Chin    | Wang    | Sto     | Oxf     | RFS                     |         | DMFS    |         | <i>ERBB2</i> <sup>+</sup>         |         | <i>ERBB2</i> <sup>-</sup> |         |     |
|                |          |       |      |      |                                                                       |         |                   |                |       |      |      |                   |                       |             |                                                                        |         |         |         |         |         | P-value                 | HR      | P-value | log(HR) | P-value                           | HR      | P-value                   | HR      |     |
| <i>PNPO</i>    | 0.6      | 3.8   | 0.8  | 0.6  |                                                                       |         |                   | 16             | 44    | 11   | 12   | 0                 | 1.1E-14               | 1.8         | 5.9E-01                                                                |         | 5.4E-01 | 6.0E-03 | 2.3E-03 | 1.4E-02 | 4.8E-01                 | 1.0     | 6.6E-01 | -0.1    | 7.2E-01                           | 0.9     | 4.3E-01                   | 0.9     |     |
| <i>PRR15L</i>  | 0.6      | 3.8   | 0.8  | 0.6  |                                                                       |         |                   | 7              | 496   | 51   | 20   |                   | 1.1E-07               | 2.9         |                                                                        |         |         |         |         |         | 5.6E-03                 | 0.8     | 3.E-02  | 0.3     |                                   |         |                           |         |     |
| <i>CBX1</i>    | 0.6      | 3.3   | 6.8  | 0.6  |                                                                       |         |                   | 4              | 21    | 34   | 4    | 0                 | 7.9E-13               | 2.2         | 2.1E-01                                                                | 7.0E-01 |         | 5.0E-01 | 4.9E-01 | 1.7E-02 | 2.4E-13                 | 1.7     | 7.E-02  | 0.3     | 3.0E-01                           | 1.3     | 1.9E-02                   | 1.6     |     |
| <i>HOXB7</i>   | 0.6      | 3.0   | 10.9 | 0.6  |                                                                       |         | LSVD              | 8              | 9     | 72   | 14   | 2                 | NS                    | NS          | 3.5E-03                                                                | 9.3E-01 | 1.9E-01 | 8.6E-01 | 3.3E-01 | 6.4E-01 | 1.1E-03                 | 1.3     | 3.E-01  | 0.2     | 6.4E-01                           | 1.1     | 9.9E-01                   | 1.0     |     |
| <i>UBE2Z</i>   | 0.6      | 3.6   | 10.7 | 0.6  |                                                                       |         |                   | 43             | 266   | 426  | 19   | 3                 | 5.9E-20               | 2.0         | 1.5E-04                                                                | 4.9E-01 | 2.0E-01 | 5.4E-02 | 1.8E-02 | 7.0E-06 | 1.0E-01                 | 0.9     | 2.E-01  | 0.2     | 9.9E-02                           | 0.7     | 1.8E-02                   | 1.8     |     |
| <i>SNF8</i>    | 0.6      | 3.6   | 10.7 | 0.6  |                                                                       |         |                   | 22             | 226   | 553  | 20   | 0                 | NS                    | NS          | 2.0E-04                                                                | 5.7E-03 | 6.4E-02 | 1.3E-02 | 1.5E-02 | 1.6E-02 | 9.5E-01                 | 1.0     | 1.E-02  | 0.4     | 1.7E-01                           | 0.7     | 3.5E-03                   | 2.0     |     |
| <i>PHB</i>     | 0.6      | 4.9   | 11.5 | 0.6  | peak                                                                  |         | LSVD              | 51             | 506   | 659  | 51   | 5                 | NS                    | NS          | 1.4E-06                                                                | 2.7E-01 | 3.0E-02 | 1.4E-05 | 8.1E-04 | 3.1E-02 | 0.0E+00                 | 1.8     | 5.E-03  | 0.4     | 1.4E-01                           | 0.8     | 4.0E-04                   | 1.8     |     |
| <i>SLC35B1</i> | 0.6      | 5.3   | 12.3 | 0.6  |                                                                       |         | LSVD              | 36             | 301   | 709  | 57   | 5                 | 1.5E-29               | 1.6         | 1.8E-07                                                                | 1.5E-02 | 3.5E-01 | 2.9E-02 | 1.3E-02 | 1.1E-02 | 1.3E-02                 | 1.2     | 0.E+00  | 0.5     | 5.7E-02                           | 0.7     | 1.6E-05                   | 2.0     |     |
| <i>KAT7</i>    | 0.6      | 5.3   | 12.3 | 0.6  |                                                                       |         | LSVD              | 5              | 22    | 25   | 1    | 1                 | NS                    | NS          | 4.5E-03                                                                | 5.7E-01 | 1.3E-01 | 9.0E-03 | 4.4E-02 | 5.5E-03 | 5.8E-02                 | 0.9     | 3.E-01  | -0.2    | 2.4E-02                           | 0.6     | 1.6E-02                   | 1.7     |     |
| <i>PDK2</i>    | 0.6      | 5.3   | 10.8 | 0.6  |                                                                       | peak    |                   | 10             | 177   | 12   | 13   | 0                 | NS                    | NS          | 6.3E-01                                                                | 9.3E-01 | 3.0E-01 | 8.8E-03 | 2.4E-03 | 5.8E-03 | 4.3E-04                 | 1.3     | 7.E-01  | 0.1     | 9.6E-01                           | 1.0     | 8.1E-01                   | 1.0     |     |
| <i>PPP1R9B</i> | 0.6      | 5.3   | 10.8 | 0.6  |                                                                       | peak    |                   | 11             | 64    | 142  | 18   | 1                 | 3.7E-19               | 1.7         | 6.8E-07                                                                | 5.0E-02 |         |         | 1.9E-01 | 2.2E-02 |                         |         | 4.E-01  | -0.1    | 5.6E-02                           | 0.3     | 8.1E-01                   | 1.1     |     |
| <i>MRPL27</i>  | 0.6      | 5.6   | 10.8 | 0.6  | peak                                                                  |         | LSVD              | 12             | 402   | 601  | 37   | 1                 | NS                    | NS          | 1.5E-06                                                                | 1.9E-02 |         | 8.5E-03 | 1.6E-02 |         | 2.5E-04                 | 0.8     | 8.E-03  | 0.4     | 9.3E-01                           | 1.0     | 1.9E-01                   | 1.4     |     |
| <i>EME1</i>    | 0.6      | 5.6   | 10.8 | 0.6  | peak                                                                  |         | LSVD              | 2              | 11    | 21   | 1    | 1                 | 2.1E-27               | 2.2         | 4.3E-07                                                                |         |         | 1.2E-01 | 1.2E-01 |         |                         |         | 0.E+00  | 0.7     | 6.4E-01                           | 1.3     | 1.7E-01                   | 1.8     |     |
| <i>LRRC59</i>  | 0.6      | 5.6   | 10.8 | 0.6  | peak                                                                  |         | LSVD              | 26             | 258   | 419  | 24   | 2                 | 2.1E-27               | 2.2         | 3.7E-07                                                                | 1.4E-04 | 4.4E-02 | 1.5E-02 | 4.3E-02 | 4.3E-02 |                         | 4.8E-08 | 1.5     | 1.E-03  | 0.5                               | 9.0E-01 | 1.0                       | 1.7E-07 | 2.2 |
| <i>EPN3</i>    | 0.6      | 5.6   | 9.1  | 0.6  | peak                                                                  |         | LSVD              | 1              | 103   | 94   | 4    | 2                 | 8.0E-21               | 2.2         | 2.3E-05                                                                | 2.7E-03 | 4.5E-01 | 1.2E-06 | 6.3E-02 | 5.8E-03 |                         | 6.1E-01 | 1.0     | 1.E-03  | 0.5                               | 3.6E-01 | 1.2                       | 3.6E-04 | 1.5 |
| <i>SPATA20</i> | 0.6      | 5.6   | 9.1  | 0.6  | peak                                                                  |         | LSVD              | 7              | 143   | 131  | 15   | 0                 | NS                    | NS          | 1.2E-01                                                                | 2.0E-04 | 8.5E-01 | 1.0E-03 | 6.4E-01 | 6.3E-02 |                         | 2.3E-06 | 0.7     | 3.E-01  | 0.2                               | 1.5E-01 | 0.8                       | 2.4E-02 | 1.3 |
| <i>ANKRD40</i> | 0.6      | 5.0   | 11.7 | 0.6  |                                                                       |         |                   | 8              | 54    | 81   | 7    | 1                 | NS                    | NS          | 3.8E-01                                                                |         | 1.5E-01 | 7.5E-01 |         | 6.4E-02 |                         | 2.1E-01 | 0.9     | 8.E-03  | 0.4                               | 9.4E-01 | 1.0                       | 8.2E-02 | 1.4 |
| <i>LUC7L3</i>  | 0.6      | 5.0   | 11.7 | 0.6  |                                                                       |         |                   | 35             | 201   | 382  | 40   |                   | NS                    | NS          |                                                                        |         |         |         |         |         |                         | 1.1E-06 | 1.4     | 2.E-01  | 0.2                               |         |                           |         |     |
| <i>TOB1</i>    | 0.6      | 5.0   | 13.6 | 0.6  |                                                                       |         |                   | 16             | 572   | 1243 | 145  | 0                 | NS                    | NS          | 2.8E-01                                                                | 1.7E-01 | 5.3E-01 | 8.5E-05 | 1.1E-02 | 3.3E-04 |                         | 2.7E-01 | 1.1     | 3.E-01  | 0.2                               | 2.9E-01 | 0.8                       | 2.3E-01 | 1.2 |
| <i>NME1</i>    | 0.6      | 0.7   | 11.4 | 0.8  |                                                                       |         | LSVD              | 28             | 31    | 850  | 73   | 5                 | 6.8E-31               | 1.7         | 5.5E-06                                                                | 9.8E-02 | 3.2E-02 | 2.3E-01 | 2.6E-01 | 3.3E-04 |                         | 7.7E-14 | 1.7     | 4.E-03  | 0.4                               | 7.3E-01 | 0.9                       | 1.2E-04 | 2.3 |
| <i>NME2</i>    | 0.6      | 0.7   | 11.4 | 0.8  |                                                                       |         | LSVD              | 69             | 64    | 1468 | 235  |                   | NS                    | NS          |                                                                        |         |         |         |         |         |                         | 7.0E-06 | 1.4     | 4.E-03  | 0.4                               |         |                           |         |     |

## Supplemental Table 8. Selection of oncogene candidates on 17q21.3.

1: n=240 (Tumorscape data set).

2: n=200, Staaf et al., 2010.

3: LSVD: Local Singular Value Decomposition, Zhang et al. 2009.

4 :Ductal breast carcinoma vs. normal breast, Over-expression, P-value < 0.05, fold change > 1.5 (www.oncomine.org).

5: n=2422, median separation (<http://kmplot.com/analysis/>).

CN: copy number. UPP: Uppsala cohort (Miller et al. 2005) . Van: Van cohort (van de Vijver et al. 2002). Chin: Chin cohort (Ivshina et al. 2006).

Wang: Wang cohort (Wang et al. 2005). Sto: Stockholm cohort (Pawitan et al. 2005). Oxf: Oxford cohort (Loi et al. 2007).

HR: hazard ratio. RFS: relapse free survival. DMFS: distant metastasis free survival.

| Lapatinib      | ER/PR (-) |        |     |         |        |     |         |        |      | ER/PR (+) |        |      |         |        |      |        |        |      | Less sensitive to Lapatinib (#) |     |        |     | 17q21.3 non-amplified |        |     | ERBB2 non-amplified |     |
|----------------|-----------|--------|-----|---------|--------|-----|---------|--------|------|-----------|--------|------|---------|--------|------|--------|--------|------|---------------------------------|-----|--------|-----|-----------------------|--------|-----|---------------------|-----|
|                | HCC202    |        |     | UACC893 |        |     | HCC1419 |        |      | HCC2218   |        |      | ZR75-30 |        |      | BT474  |        |      | MB361                           |     | CAMA1  |     | SKBR3                 |        |     | MCF7                |     |
|                | (-)       | (+)    | CN  | (-)     | (+)    | CN  | (-)     | (+)    | CN   | (-)       | (+)    | CN   | (-)     | (+)    | CN   | (-)    | (+)    | CN   | (-)                             | CN  | (-)    | CN  | (-)                   | (+)    | CN  | (-)                 | CN  |
| <b>ERBB2</b>   | 0.683*    | 0.865* | 4.9 | 0.677*  | 0.771* | 21  | 0.496*  | 0.561* | 19.2 | 0.433*    | 0.383* | 12.8 | 0.374*  | 0.404* | 18.8 | 0.295* | 0.427* | 14.1 | 0.946                           | 7.3 | 0.794* | 6.7 | 0.144*                | 0.219* | 9.4 | 0.754*              | 1.4 |
| <b>PNPO</b>    | 0.800*    | 0.781* | 1.5 | 0.779*  | 0.791* | 1.8 | 0.812*  | 0.841* | 7.5  | 0.845*    | 0.956  | 1.7  | 0.845*  | 0.881* | 1.5  | 0.832* | 0.773* | 1.9  | 0.777*                          | 3.8 | 0.511* | 1.6 | 0.803*                | 0.992  | 1.6 | 0.584*              | 2.9 |
| <b>PRR15L</b>  | 0.772*    | 0.712* | 1.5 | 0.683*  | 0.730* | 1.8 | 0.996   | 1.164* | 7.5  | 0.627*    | 0.818* | 1.7  | 1.047   | 1.03   | 1.5  | 0.955  | 1.139  | 1.9  | 0.934                           | 3.8 | 1.008  | 1.6 | 0.973                 | 1.065* | 1.6 | 0.781*              | 2.9 |
| <b>CBX1</b>    | 0.644*    | 0.723* | 1.5 | 0.781*  | 0.723* | 1.8 | 0.848*  | 0.868* | 7.5  | 0.560*    | 0.709* | 1.7  | 0.918*  | 0.928  | 17.8 | 0.909* | 0.973  | 1.9  | 1.019                           | 3.8 | 0.787* | 1.6 | 0.986                 | 1.015  | 1.6 | 0.736*              | 2.9 |
| <b>HOXB7</b>   | 0.817*    | 0.896  | 8.3 | 0.743*  | 0.752* | 1.8 | 0.612*  | 0.768* | 7.5  | 0.595*    | 0.662* | 14.9 | 0.733*  | 0.915  | 11.1 | 0.614* | 0.642* | 14.4 | 0.567*                          | 3.8 | 0.550* | 6.8 | 0.756*                | 0.809* | 1.6 | 0.544*              | 2.9 |
| <b>UBE2Z</b>   | 0.655*    | 0.607* | 8.3 | 0.799*  | 0.749* | 1.8 | 0.963   | 0.951* | 7.5  | 0.646*    | 0.709* | 14.9 | 0.844*  | 0.883* | 6.9  | 1.06   | 0.919  | 5.8  | 1.094*                          | 3.8 | 0.885* | 4.5 | 1.117*                | 1.130* | 1.6 | 0.741*              | 2.9 |
| <b>SNF8</b>    | 0.759*    | 0.663* | 4.7 | 0.880*  | 0.440* | 1.8 | 1.003   | 0.894* | 7.5  | 0.923     | 0.933  | 14.9 | 0.972   | 0.926  | 6.9  | 0.996  | 0.687* | 5.8  | 0.813*                          | 3.8 | 0.473* | 4.5 | 0.898*                | 0.782* | 1.6 | 0.834*              | 2.9 |
| <b>PHB</b>     | 0.885*    | 0.894* | 4.7 | 0.918*  | 0.838* | 1.8 | 0.956*  | 0.984  | 7.5  | 0.847*    | 0.893  | 5.7  | 0.876*  | 0.837* | 3.9  | 0.992  | 0.979  | 5.8  | 1.053                           | 3.8 | 0.587* | 4.5 | 0.765*                | 0.904  | 1.6 | 0.947               | 2.9 |
| <b>SLC35B1</b> | 1.008     | 0.956  | 4.7 | 0.856*  | 0.874* | 3.1 | 0.97    | 1.004  | 7.5  | 0.909     | 0.903  | 5.7  | 0.867*  | 0.891* | 3.9  | 1.073  | 1.081  | 5.8  | 1.001                           | 3.8 | 0.812* | 4.5 | 1.255*                | 1.350* | 1.6 | 0.881*              | 2.9 |
| <b>KAT7</b>    | 0.642*    | 0.574* | 4.7 | 0.870*  | 0.692* | 3.1 | 1.068*  | 0.993  | 7.5  | 0.649*    | 0.715* | 5.7  | 0.954   | 0.93   | 3.9  | 1.05   | 1.194* | 5.8  | 0.834*                          | 3.8 | 0.815* | 4.5 | 1.139*                | 1.217* | 1.6 | 0.693*              | 2.9 |
| <b>PDK2</b>    | 0.955     | 0.931  | 4.7 | 0.575*  | 0.614* | 3.1 | 0.901*  | 0.882* | 7.5  | 0.717*    | 0.885  | 5.7  | 0.786*  | 0.834* | 3.9  | 0.883* | 0.855  | 5.8  | 0.604*                          | 3.8 | 0.802* | 4.5 | 0.817*                | 1.049  | 1.6 | 0.872*              | 2.9 |
| <b>PPP1R9B</b> | 0.789*    | 0.981  | 4.7 | 0.760*  | 0.772* | 3.1 | 0.914*  | 0.992  | 7.5  | 0.739*    | 0.885  | 5.7  | 1.076   | 1.232* | 3.9  | 0.743* | 0.731* | 5.8  | 0.884*                          | 3.8 | 0.672* | 4.5 | 0.964                 | 1.041  | 1.6 | 0.673*              | 2.9 |
| <b>MRPL27</b>  | 0.722*    | 0.757* | 4.7 | 0.832*  | 0.847* | 3.1 | 0.941*  | 0.942  | 4    | 0.840*    | 0.877* | 5.7  | 0.890*  | 0.884* | 2.4  | 1.112* | 0.851* | 5.8  | 0.841*                          | 3.8 | 1.232* | 4.5 | 0.938                 | 0.839* | 1.6 | 0.807*              | 2.9 |
| <b>EME1</b>    | 0.727*    | 0.544* | 4.7 | 0.775*  | 0.403* | 3.1 | 1.044   | 0.920* | 4    | 0.964     | 0.933  | 5.7  | 0.897*  | 0.874* | 2.4  | 0.958  | 0.653* | 5.8  | 0.955                           | 3.8 | 0.519* | 4.5 | 1.131*                | 1.257* | 1.6 | 0.908               | 2.9 |
| <b>LRRC59</b>  | 1.209*    | 1.099  | 4.7 | 0.962   | 0.802* | 3.1 | 1.003   | 1.013  | 4    | 0.966     | 0.947  | 5.7  | 0.989   | 0.969  | 2.4  | 0.983  | 0.880* | 5.8  | 0.986                           | 3.8 | 0.678* | 4.5 | 0.994                 | 0.898* | 1.6 | 0.965               | 2.9 |
| <b>EPN3</b>    | 1.225*    | 1.245* | 4.7 | 1.076   | 0.966  | 3.1 | 1.065*  | 1.016  | 2.1  | 1.018     | 0.981  | 5.7  | 0.974   | 0.942  | 2.4  | 1.102  | 1.154* | 5.8  | 1.017                           | 3.8 | 0.981  | 4.5 | 0.983                 | 0.873* | 1.6 | 1.257*              | 2.9 |
| <b>SPATA20</b> | 0.794*    | 0.767* | 4.7 | 0.726*  | 0.507* | 3.1 | 0.870*  | 0.830* | 2.1  | 0.677*    | 0.687* | 5.7  | 0.774*  | 0.760* | 2.4  | 0.880* | 0.669* | 5.8  | 0.857*                          | 3.8 | 0.826* | 4.5 | 0.770*                | 0.683* | 1.6 | 0.943               | 2.9 |
| <b>ANKRD40</b> | 1.057     | 1.045  | 6.8 | 0.827*  | 0.821* | 3.1 | 0.967   | 0.974  | 2.1  | 0.95      | 1.025  | 5.7  | 0.99    | 1.072  | 2.4  | 1.096* | 1.067  | 5.8  | 1.037                           | 3.8 | 0.631* | 4.5 | 1.125*                | 1.287* | 1.6 | 0.968               | 2.9 |
| <b>LUC7L3</b>  | 0.978     | 0.885* | 6.8 | 0.827*  | 0.544* | 3.1 | 0.941*  | 0.841* | 2.1  | 0.974     | 0.974  | 5.7  | 0.892*  | 0.825* | 2.4  | 1.072* | 0.934  | 5.8  | 0.924                           | 3.8 | 0.685* | 4.5 | 0.824*                | 0.838* | 1.6 | 0.772*              | 2.9 |
| <b>TOB1</b>    | 0.743*    | 0.674* | 6.8 | 0.653*  | 0.493* | 3.1 | 1.001   | 0.907* | 2.1  | 0.862*    | 0.869* | 5.7  | 0.861*  | 0.814* | 2.4  | 0.932  | 0.614* | 2.9  | 0.843*                          | 3.8 | 0.495* | 4.5 | 0.828*                | 0.818* | 1.6 | 0.805*              | 2.9 |
| <b>NME1</b>    | 1.013     | 1.162* | 6.8 | 1.323*  | 1.169* | 3.1 | 1.065*  | 1.077* | 2.1  | 0.873*    | 0.965  | 2.4  | 1.103*  | 1.096* | 2.4  | 1.146* | 1.117* | 2.9  | 1.154*                          | 3.8 | 0.988  | 2.3 | 1.164*                | 1.247* | 1.6 | 1.109*              | 2.9 |
| <b>NME2</b>    | 0.536*    | 0.443* | 6.8 | 0.897   | 0.622* | 3.1 | 0.930*  | 0.912* | 2.1  | 0.410*    | 0.461* | 2.4  | 1.076   | 1.152* | 2.4  | 0.978  | 0.707* | 2.9  | 1.061                           | 3.8 | 0.820* | 2.3 | 0.996                 | 0.874* | 1.6 | 0.851*              | 2.9 |

**Supplemental Table 9. Cell proliferation assay read-outs (relative to the negative control) for 10 breast cancer cell lines treated with gene-specific siRNAs in the presence or in the absence of Lapatinib.**

\*: P-value < 0.05 (Student's t-test).

#: Konecny et al. 2006.

CN: copy number of the gene in each cell line (modified from Kao et al. 2009 and Tumorscape (CAMA1))

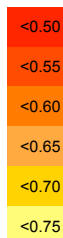

|         |          | HCC202 | UACC893 | HCC1419 | HCC2218 | ZR75-30 | BT474 |
|---------|----------|--------|---------|---------|---------|---------|-------|
|         | ERBB2    | 1.27   | 1.14    | 1.13    | 0.89    | 1.08    | 1.45  |
| 17q21.3 | PNPO     | 0.98   | 1.02    | 1.04    | 1.13    | 1.04    | 0.93  |
|         | PRR15L   | 0.92   | 1.07    | 1.17    | 1.31    | 0.98    | 1.19  |
|         | CBX1     | 1.12   | 0.93    | 1.02    | 1.27    | 1.01    | 1.07  |
|         | HOXB7    | 1.10   | 1.01    | 1.26    | 1.11    | 1.25    | 1.05  |
|         | UBE2Z    | 0.93   | 0.94    | 0.99    | 1.10    | 1.05    | 0.87  |
|         | SNF8     | 0.87   | 0.50    | 0.89    | 1.01    | 0.95    | 0.69  |
|         | PHB      | 1.01   | 0.91    | 1.03    | 1.05    | 0.96    | 0.99  |
|         | SLC35B1  | 0.95   | 1.02    | 1.04    | 0.99    | 1.03    | 1.01  |
|         | KAT7     | 0.89   | 0.80    | 0.93    | 1.10    | 0.98    | 1.14  |
|         | PDK2     | 0.98   | 1.07    | 0.98    | 1.23    | 1.06    | 0.97  |
|         | PPP1R9B  | 1.24   | 1.02    | 1.09    | 1.20    | 1.15    | 0.98  |
|         | MRPL27   | 1.05   | 1.02    | 1.00    | 1.04    | 0.99    | 0.77  |
|         | EME1     | 0.75   | 0.52    | 0.88    | 0.97    | 0.97    | 0.68  |
|         | LRRC59   | 0.91   | 0.83    | 1.01    | 0.98    | 0.98    | 0.90  |
|         | EPN3     | 1.02   | 0.90    | 0.95    | 0.96    | 0.97    | 1.05  |
|         | SPATA20  | 0.97   | 0.70    | 0.95    | 1.02    | 0.98    | 0.76  |
|         | ANKRD40  | 0.99   | 0.99    | 1.01    | 1.08    | 1.08    | 0.97  |
|         | LUC7L3   | 0.90   | 0.66    | 0.89    | 1.00    | 0.92    | 0.87  |
|         | TOB1     | 0.91   | 0.76    | 0.91    | 1.01    | 0.95    | 0.66  |
|         | NME1     | 1.15   | 0.88    | 1.01    | 1.10    | 0.99    | 0.98  |
|         | NME2     | 0.83   | 0.69    | 0.98    | 1.12    | 1.07    | 0.72  |
| 2p23    | RAB10    | 1.05   | 1.02    | 1.08    | 1.07    | 1.09    | 1.14  |
|         | EPT1     | 1.00   | 0.91    | 1.06    | 0.98    | 1.01    | 1.01  |
|         | YPEL5    | 1.06   | 0.98    | 0.82    | 0.89    | 1.10    | 1.03  |
|         | TTC27    | 1.09   | 1.06    | 1.14    | 0.96    | 0.97    | 0.97  |
|         | HADHB    | 0.97   | 0.99    | 1.06    | 0.96    | 1.03    | 1.02  |
|         | OST4     | 1.00   | 0.88    | 1.03    | 0.92    | 1.03    | 0.95  |
|         | ATRAID   | 0.83   | 0.71    | 0.85    | 0.95    | 0.99    | 0.94  |
|         | SLC4A1AP | 1.03   | 1.09    | 1.01    | 1.08    | 1.05    | 1.04  |
|         | MRPL33   | 0.98   | 1.02    | 0.86    | 0.98    | 1.05    | 0.94  |

**Supplemental Table 10. Relative cell proliferation ratios between cells cultured in the presence and in the absence of Lapatinib ((+) / (-)) following treatment with gene targeting siRNAs.**

Yellow: synergistic effect of siRNA and Lapatinib (ratio < 1.0, P-value < 0.05, Student's t-test)

Blue: antagonistic effect of siRNA and Lapatinib (ratio > 1.0, P-value < 0.05, Student's t-test)

**Supplemental Figures**

**BT47**  
ER-, PR+, ERBB2+++  
*Luminal B*

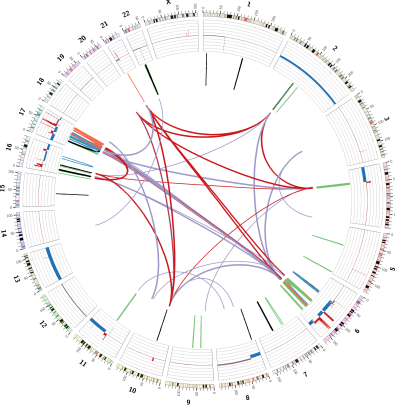

**BT55**  
ER+, ERBB2+++  
*Luminal B*

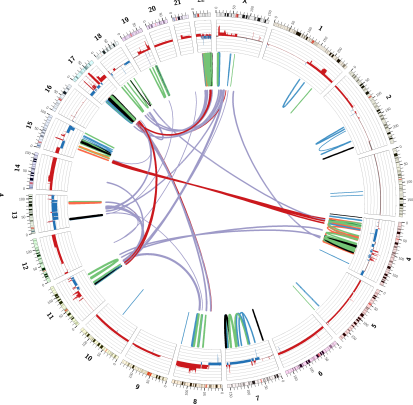

**BT58**  
ER-, ERBB2+++  
*ERBB2*

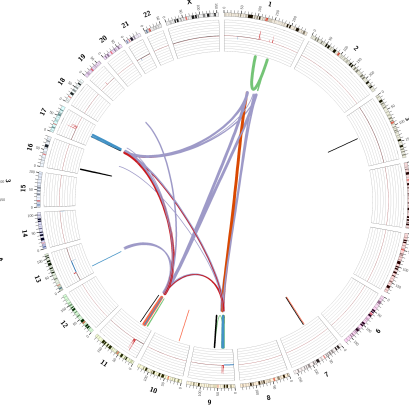

**BT71**  
ER++, ERBB2-  
*Luminal A*

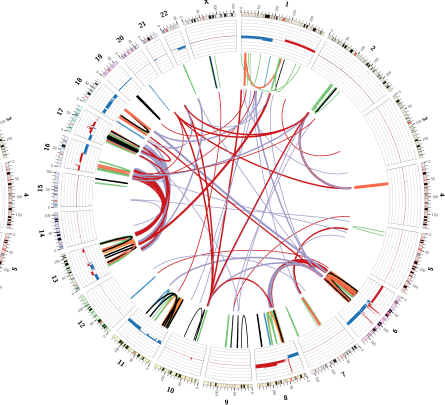

**BT73**  
ER+++, ERBB2+  
*Luminal B*

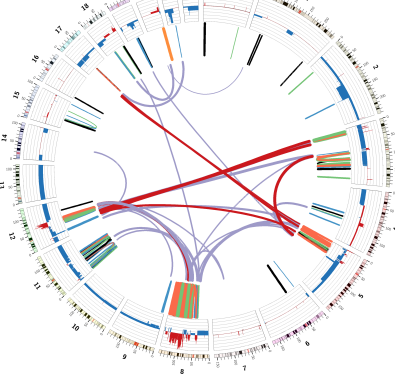

**BT122**  
ER-, ERBB2-  
*TNB*

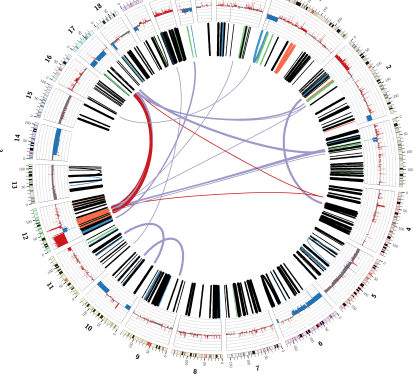

**BT146**  
ER-, ERBB2+++  
*ERBB2*

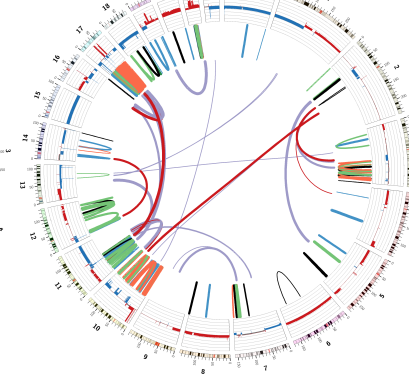

**BT191**  
ER-, ERBB2+++  
*ERBB2*

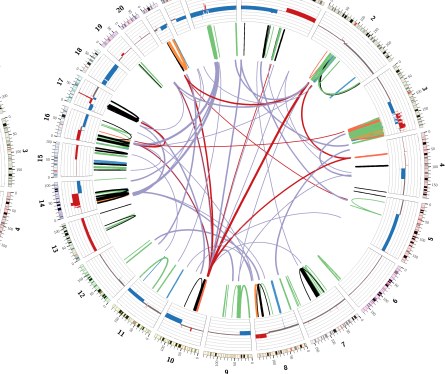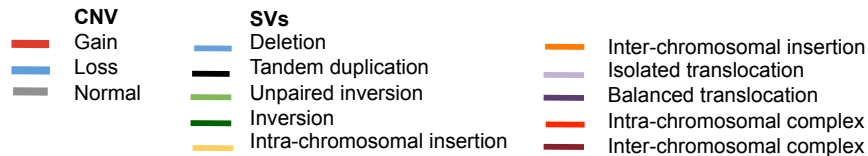

## Supplemental Figure 1. Genomic organization of eight breast tumors.

Circos plots representing the somatic genomic structure of the eight breast cancer studied. Tracks from the outermost to the innermost: 1) *Hg18* cytogenetic banding; 2) Copy number changes in the tumour genome compared to its normal counterpart; 3) Somatic structural variations as defined by DNA-PET analysis (described in Hillmer *et al.* 2011). CNV, Copy Number Variations; SV, Structural Variations. ER, PR and ERBB2 immunohistochemistry scores, as well as the breast cancer subtype classification, are indicated next to the sample ID.

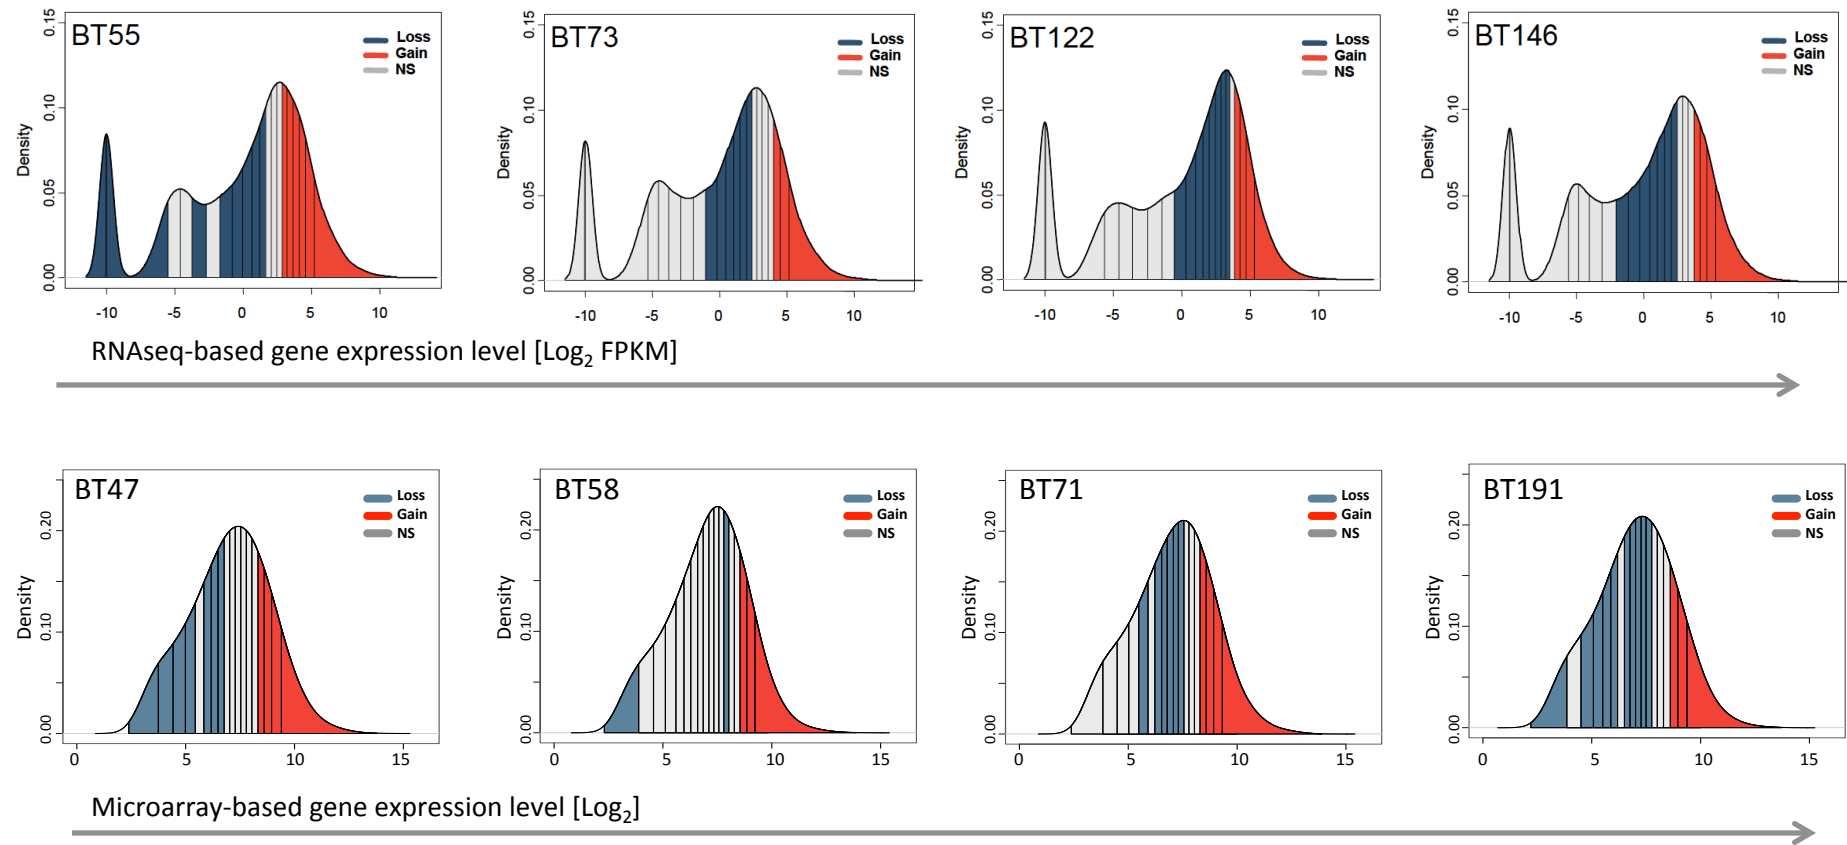

### Supplemental Figure 2. Copy Number Variations affect the overall transcriptional output of cancer samples.

For each tumor examined, genes affected by copy number gain and loss associate with high and low absolute levels of gene expression, respectively. For each sample, genes were ranked based on their level of expression and binned accordingly into 2,000-gene bins, with contiguous bins overlapping by 1,000 genes. For each bin, the Fisher's exact test was used to test the significance of the enrichment in genes affected by copy number change. Significant bins ( $P\text{-value} < 0.05$ ) are colorized in the density plot according to the direction of the enrichment: gain (red) or loss (blue). NS, not significantly enriched.



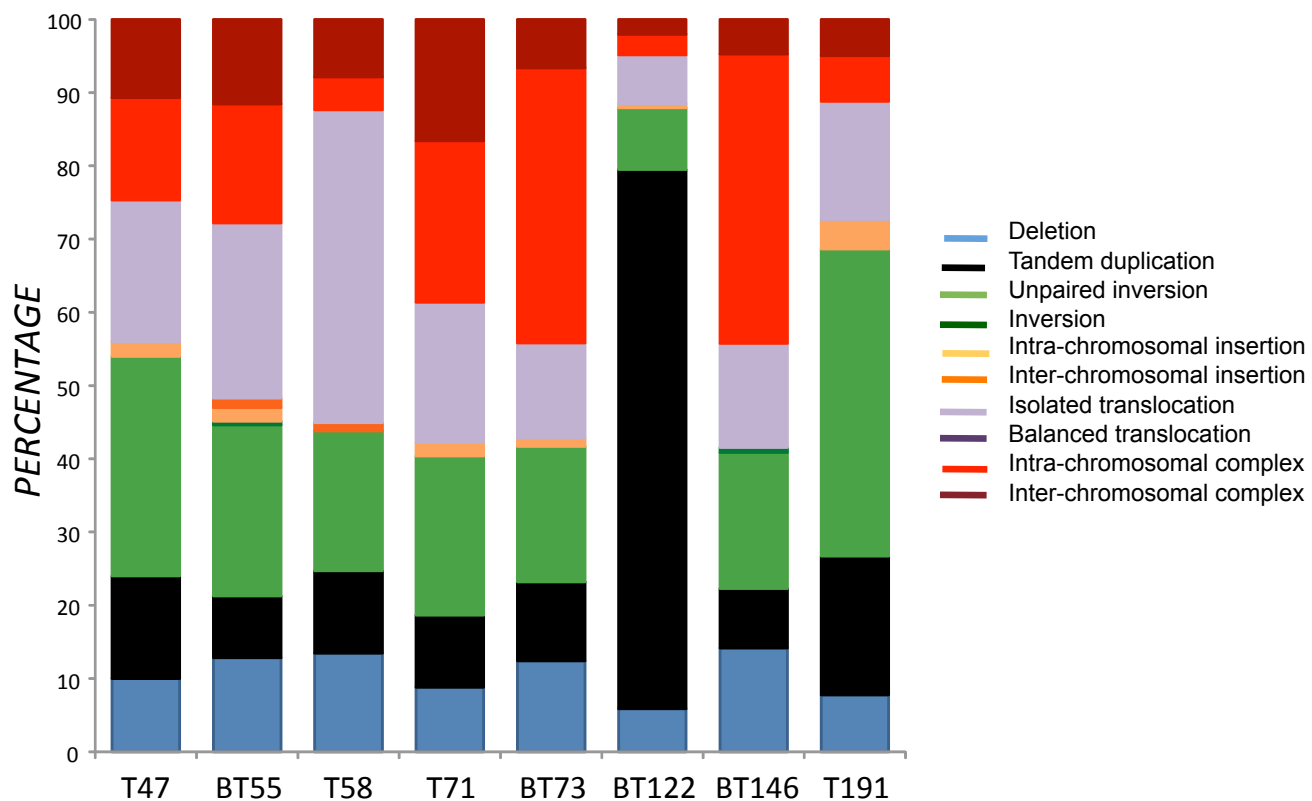

**Supplemental Figure 3. Percentage of somatic structural variations in the eight breast tumors analyzed.**

# S4A

## Reference genome

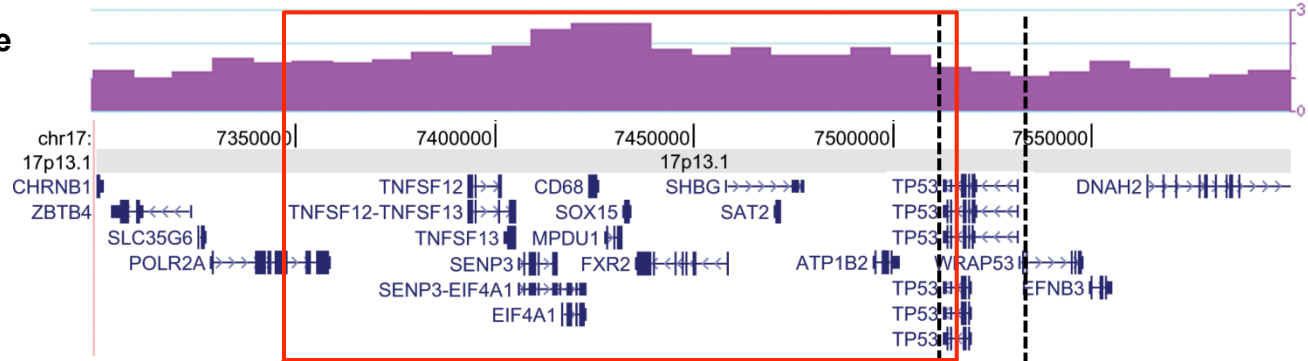

## U-Inv 29

## U-Inv 30

## Cancer genome

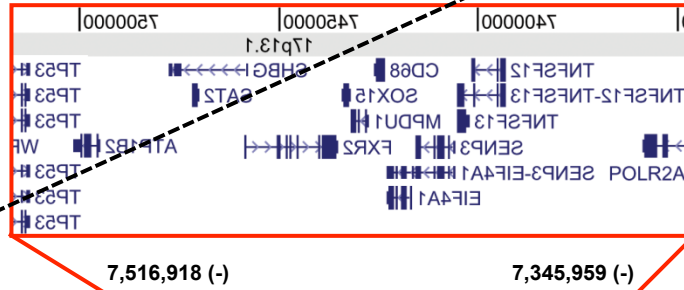

**7,516,918 (-)**

**7,345,959 (-)**

***TP53-POLR2A* fusion gene**

**7,524,823**

**7,517,161**

## RNA-seq

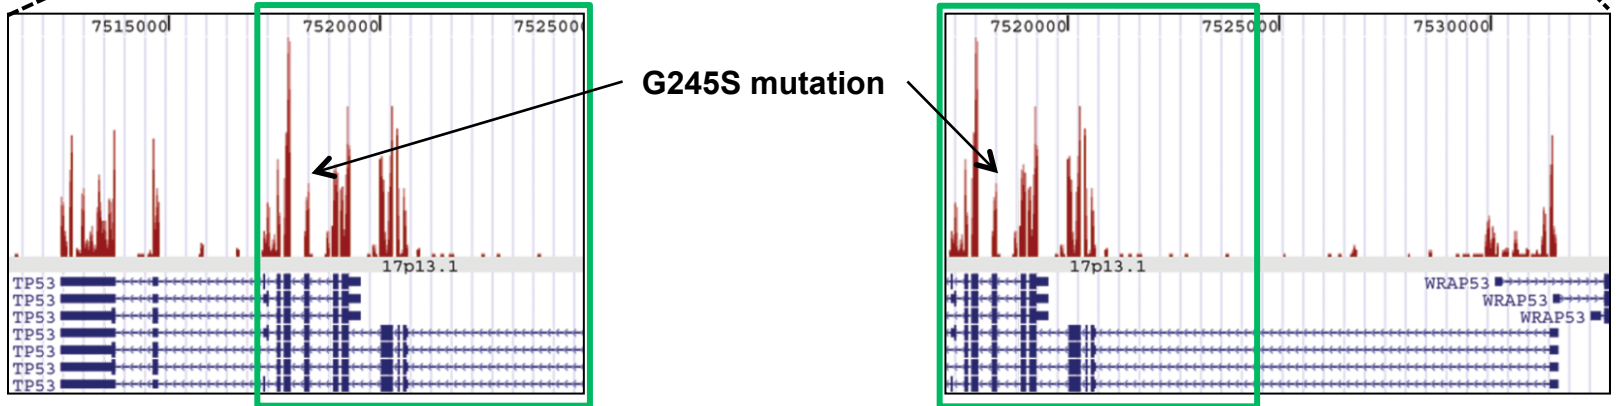

## G245S mutation

# S4B

**8q24.11 (Rev)** *EIF3H* (FPKM:734.4) 117,763,686

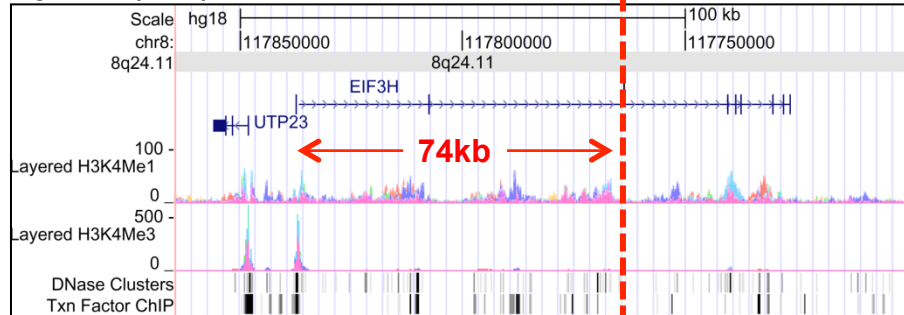

**8q24.13 (Rev)** *HAS2* (FPKM:2.9)

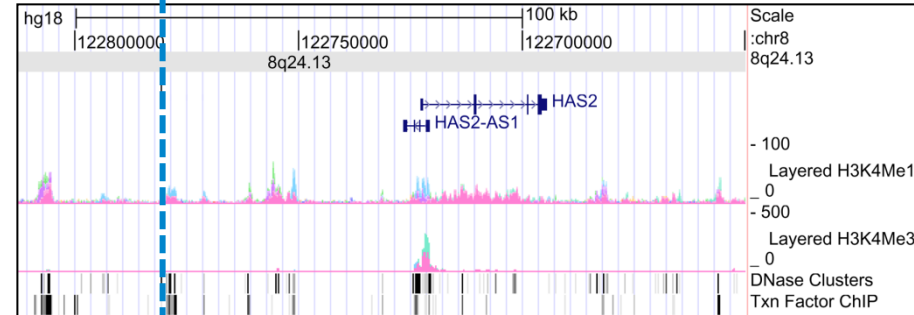

U-Inv 332

U-Inv 204

**8q24.21**

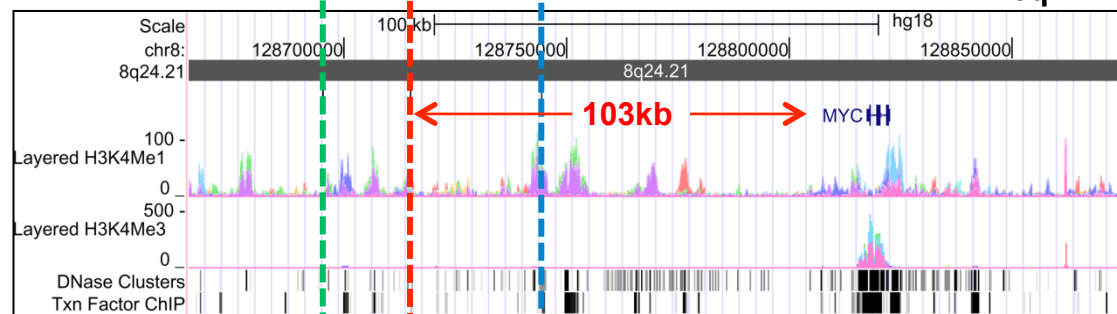

*MYC* (FPKM:114.7)

U-Inv 124, 42  
Del 44

**8q23.1 (Rev)** *OXR1* (FPKM:4.5)

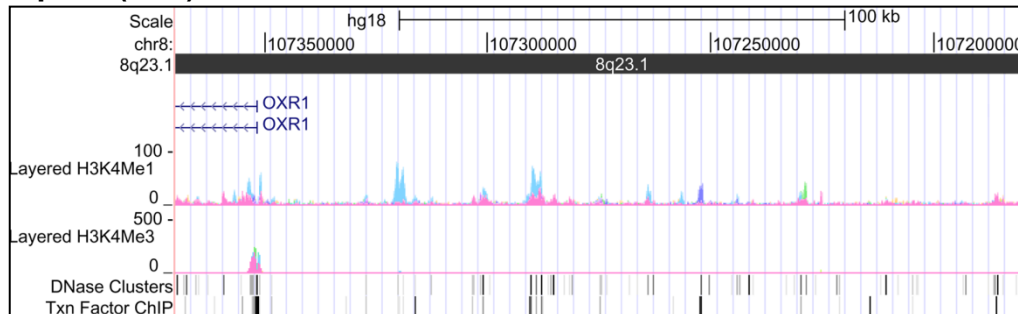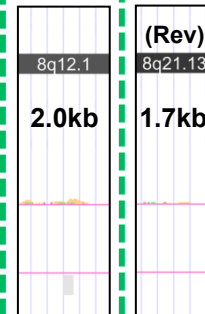

Insertions  
(intergenic)

107,179,101

60,687,369- 84,774,982-  
60,689,400 84,773,329

**Supplemental Figure 4. Somatic structural variations affecting gene integrity**

(A) In the BT122 sample, an inverted duplication on 17p causes the truncation of the *TP53* gene and its fusion to the *POLR2A* gene located upstream. This event corresponds to low levels of *TP53* expression (6.4 FPKM in BT122, 3 times lower than the average expression across the four breast cancer samples for which RNAseq data is available). (B) In the BT73 sample, an intra-chromosomal inversion causes the translocation of the highly expressed *EIF3H* gene promoter to ~100 Kbps upstream of the *MYC* locus on Chr 8q.

# S5

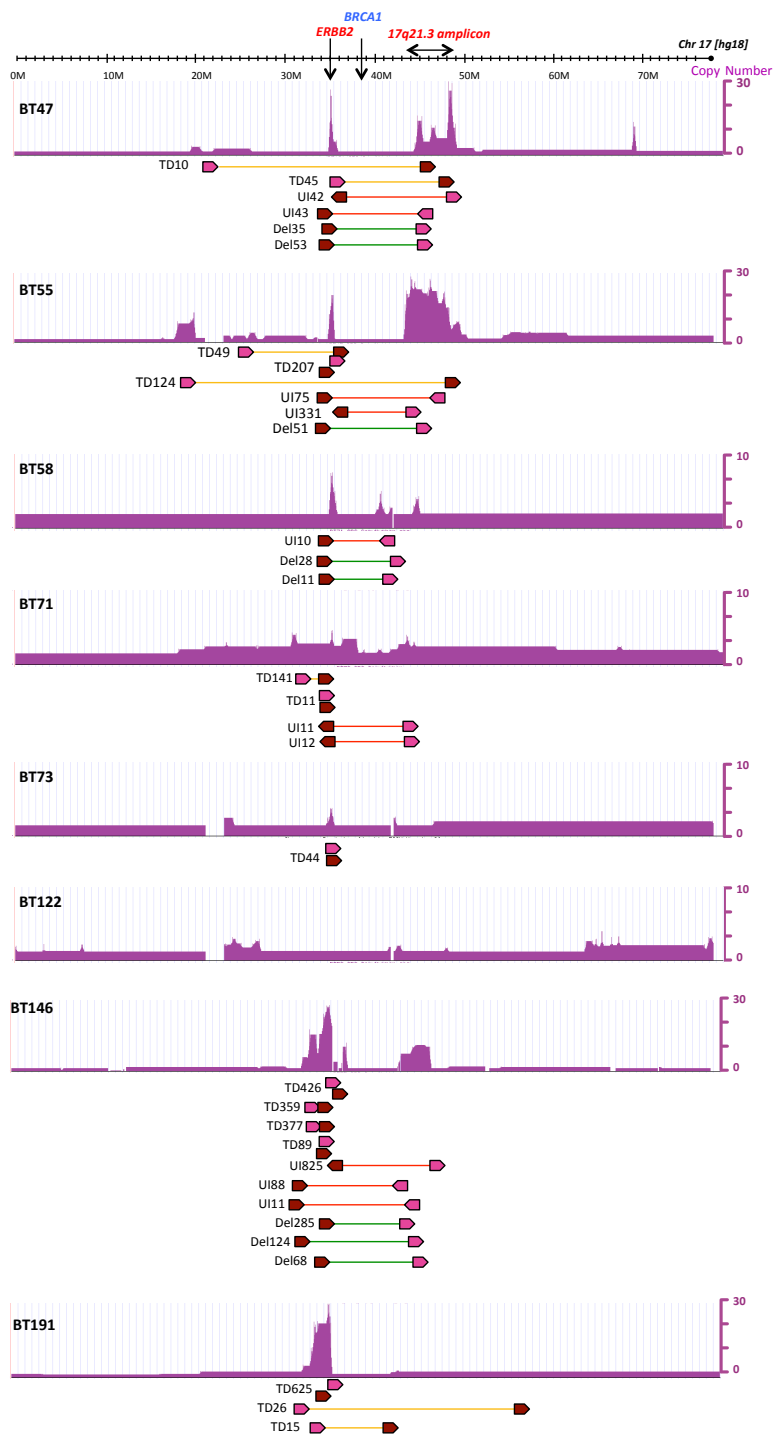

**Supplemental Figure 5. Recurrent structural variations affecting Chr 17.**

Copy number profile and somatic recurrent structural variations affecting Chr 17 in the eight analyzed breast cancers. A more detailed description of the somatic events affecting Chr 17 in BT55, BT146, BT47 and BT73 can be found in Fig. 4 and Supplemental Figs. 9A-D. For each structural variation, the brown and pink arrowheads correspond to the left and right mate pair read clusters, respectively. SV break points map to the end of the brown arrowhead and to the start of the pink arrowhead (as detailed in Hillmer *et al.* 2011). TD, tandem duplication (yellow); UI, unpaired inversion (red); Del, deletion (green). The number associated with each structural variation corresponds to its cluster size.



### Supplemental Figure 6. Organization of Chr 12 in breast cancer

(A) Chromosomal map of Chr 12, showing the copy number state of the eight sequenced breast tumors, the frequency of copy number gain and loss across 1,174 breast cancer samples, and the number of genes associated with good and poor breast cancer patients' prognosis. (B) (upper panel) copy number and structural variations on Chr 12 in BT122. The inset represents a magnified view of the *CDK4* locus. TD, tandem duplication. UI, unpaired-inversion. Translocations are indicated by arrows. The number associated with each structural variation corresponds to its cluster size. Structural variations are depicted as in Supplemental Fig. 5. (lower panel) copy number ratios (vs. the paired normal genome) and levels of gene expression (FPKM by RNA-seq) of the *CCND2*, *KRAS*, and *CDK4* genes in the four tumors for which RNAseq expression data is available. (C) Plausible mechanism of Chr 12 structural rearrangement in BT122. The sequence of structural variations described in the figure converge to a tandem duplication encompassing the *CDK4* gene. The segmental duplication was followed by unpaired inversions UI764 and UI506, which corresponds to a tandem duplication in the cancer genome, leading to an increase in the copy number of the *CDK4* locus. The amplified DNA fragment presumably connects to the short arm of Chr 12, which harbors the *KRAS* and *CCND2* genes, via a centromeric fusion, followed by unpaired inversion UI363, indicative of a breakage-fusion-bridge event. Finally, the rearranged Chr 12 is further amplified through aneuploidy.



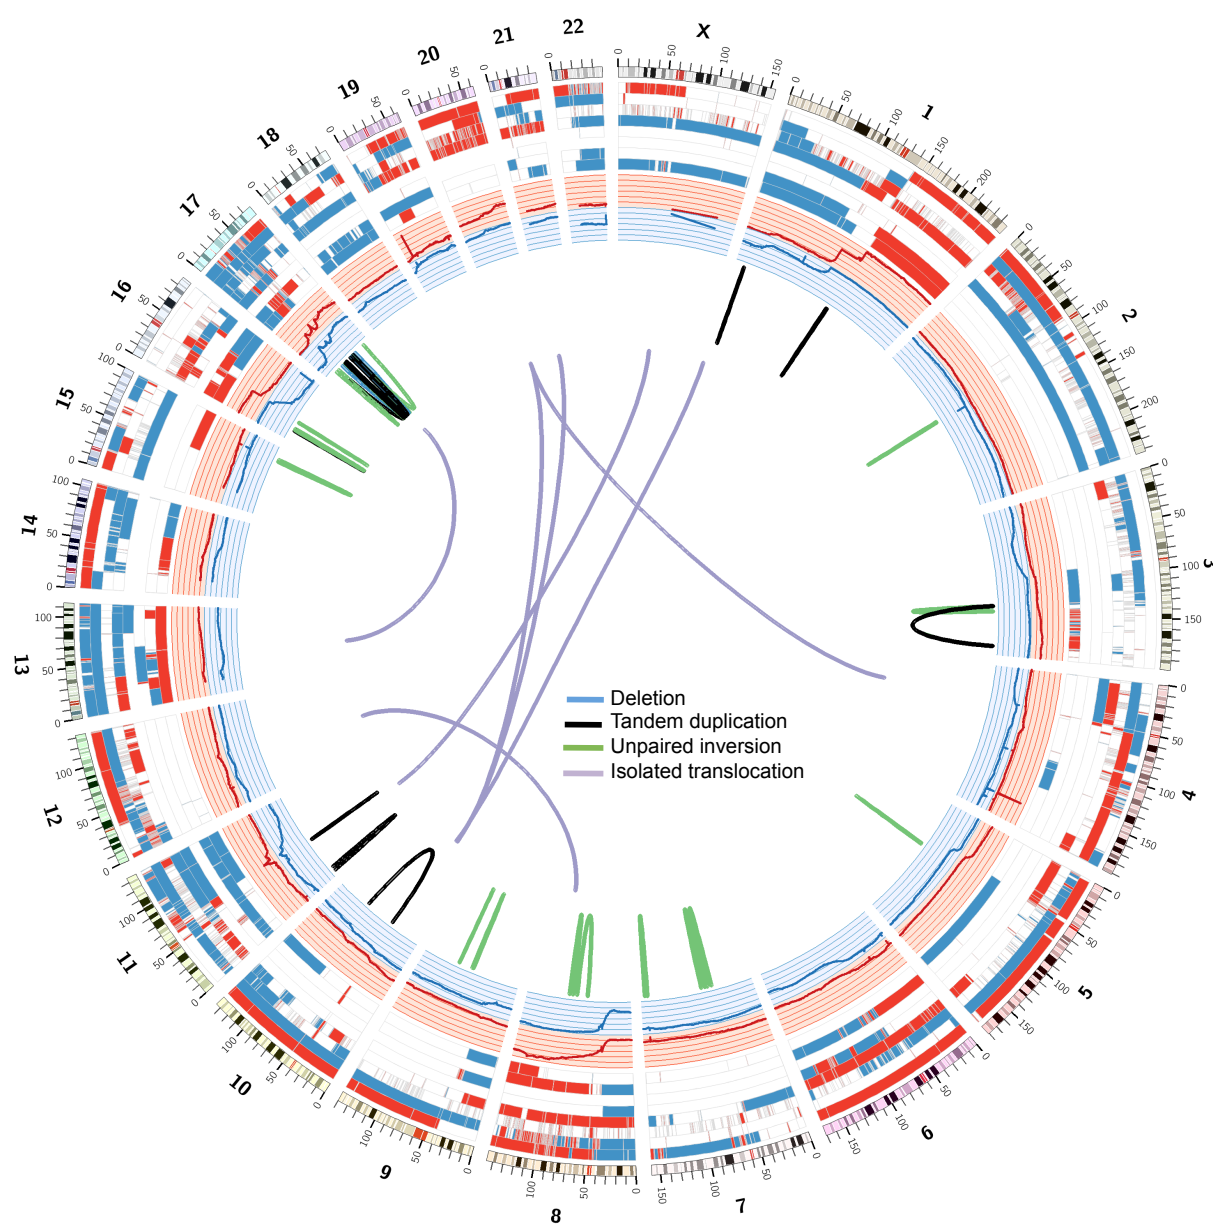

**Supplemental Figure 7. Circos plot of recurrent structural variations.**  
 The figure shows the copy number state of eight tumors (red, copy number gain; blue, copy number loss; from the outmost to the innermost: BT55, BT73, BT122, BT146, BT47, BT58, BT71, BT191), the frequency of copy number gain (red) and loss (blue) across a data set of 1,174 breast tumors, and the recurrent structural mutations observed across the eight breast tumors analyzed (as in Supplemental Table 7).

Difference in the frequency of copy number gain (red) or loss(blue) between ERBB2(+) and ERBB2(-) samples

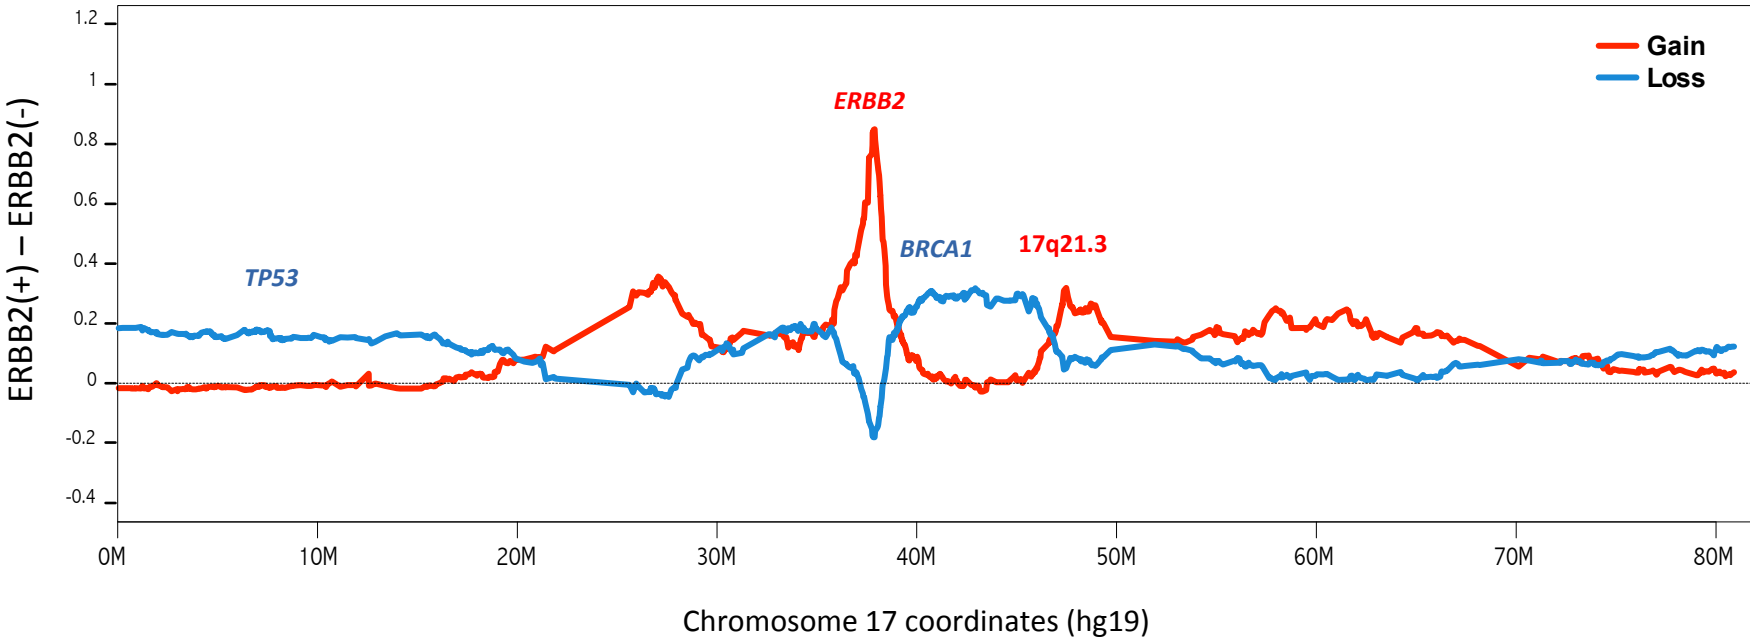

| ERBB2 status  | Number of samples | Frequency of TP53 loss | Frequency of BRCA1 loss | Frequency of 17q21.3 gain |
|---------------|-------------------|------------------------|-------------------------|---------------------------|
| ERBB2-amp (+) | 178               | 0.58                   | 0.47                    | 0.54                      |
| ERBB2-amp (-) | 996               | 0.41                   | 0.19                    | 0.22                      |
| P-value*      |                   | 1.777e-05              | 4.134e-14               | < 2.2e-16                 |

\* Fisher's Exact Test

S8B

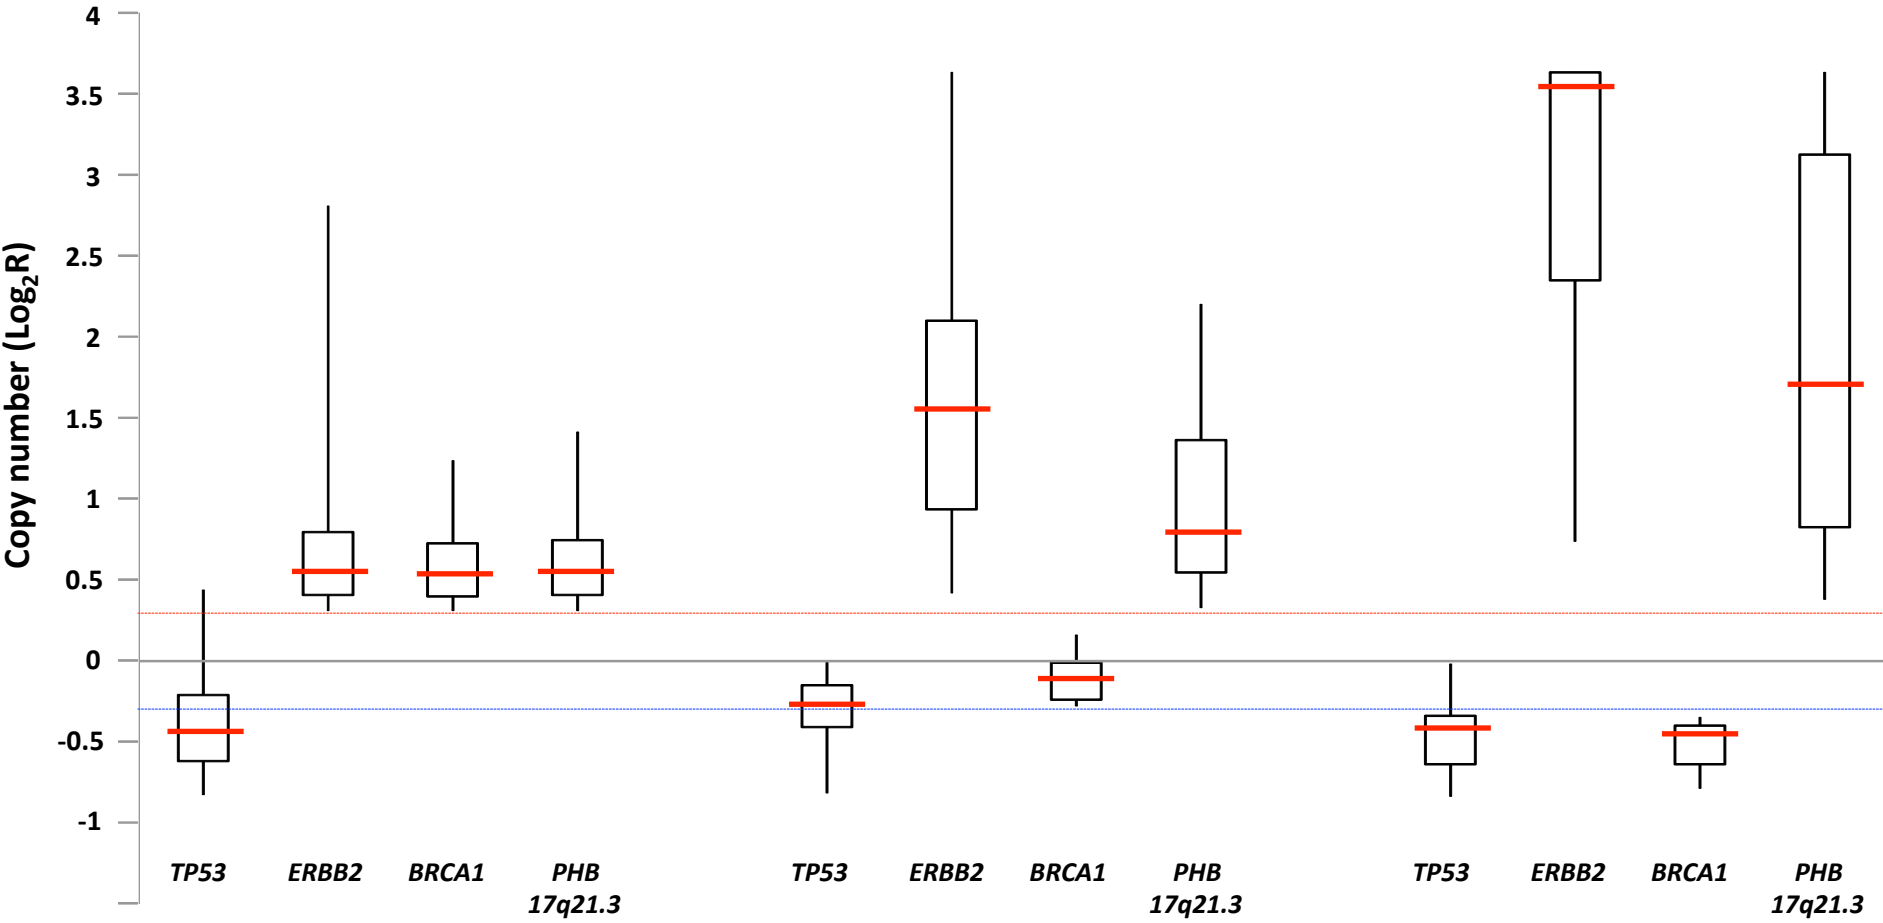

| BRCA1-gain (>0.3)         |       |      |      |      | BRCA1-no change |         |         |      | BRCA1-loss (< -0.3) |          |       |         |
|---------------------------|-------|------|------|------|-----------------|---------|---------|------|---------------------|----------|-------|---------|
| Number                    | 125   |      |      |      | 39              |         |         |      | 53                  |          |       |         |
| Median Log <sub>2</sub> R | -0.46 | 0.55 | 0.53 | 0.55 | -0.27           | 1.55    | -0.1    | 0.77 | -0.43               | 3.66     | -0.48 | 1.68    |
| Median copy number        | 1.5   | 2.9  | 2.9  | 2.9  | 1.7             | 5.6     | 1.9     | 3.4  | 1.5                 | 25.3     | 1.4   | 6.4     |
| P-value (vs. Gain)        |       |      |      |      | NS              | 4.8E-06 | 4.0E-03 |      | NS                  | <2.2E-16 |       | 1.7E-09 |

### Supplemental Figure 8. Structure of Chr 17 in breast cancer

(A) Difference in the frequency of copy number gain (red) or loss (blue) between ERBB2(+) and ERBB2(-) samples (n=1,174 breast cancer samples). (B) Copy number log<sub>2</sub> ratio distributions of critical Chr 17 genes, based on a total of 217 breast cancer samples characterized by additional copies of both the *ERBB2* and the 17q21.3 (*PHB*) loci. Box plots represent the 0.25 and 0.75 percentiles, with vertical lines corresponding to 0.05 to 0.95 percentiles. Red horizontal lines indicate median values. Samples were separated into three groups based on the *BRCA1* gene copy number state. P-values are based on the Student's t-test. NS, not significant.

# S9A

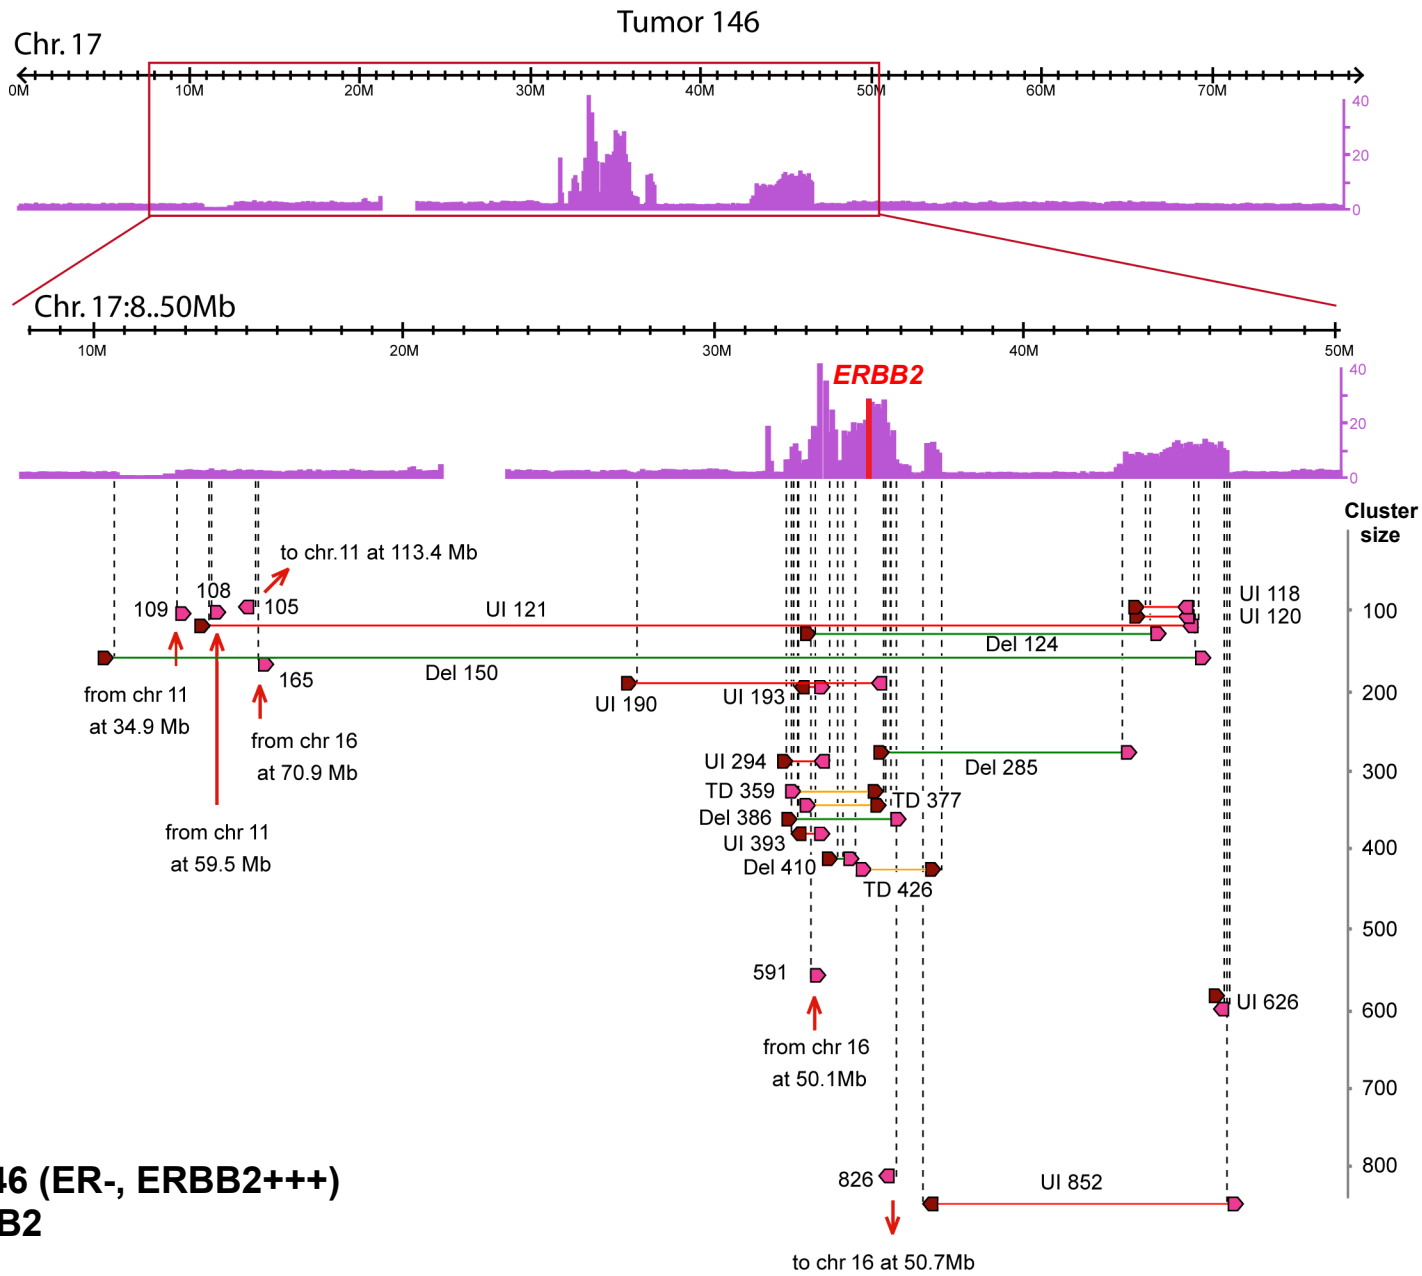

# S9B

BT146 (ER-, ERBB2+++)  
ERBB2

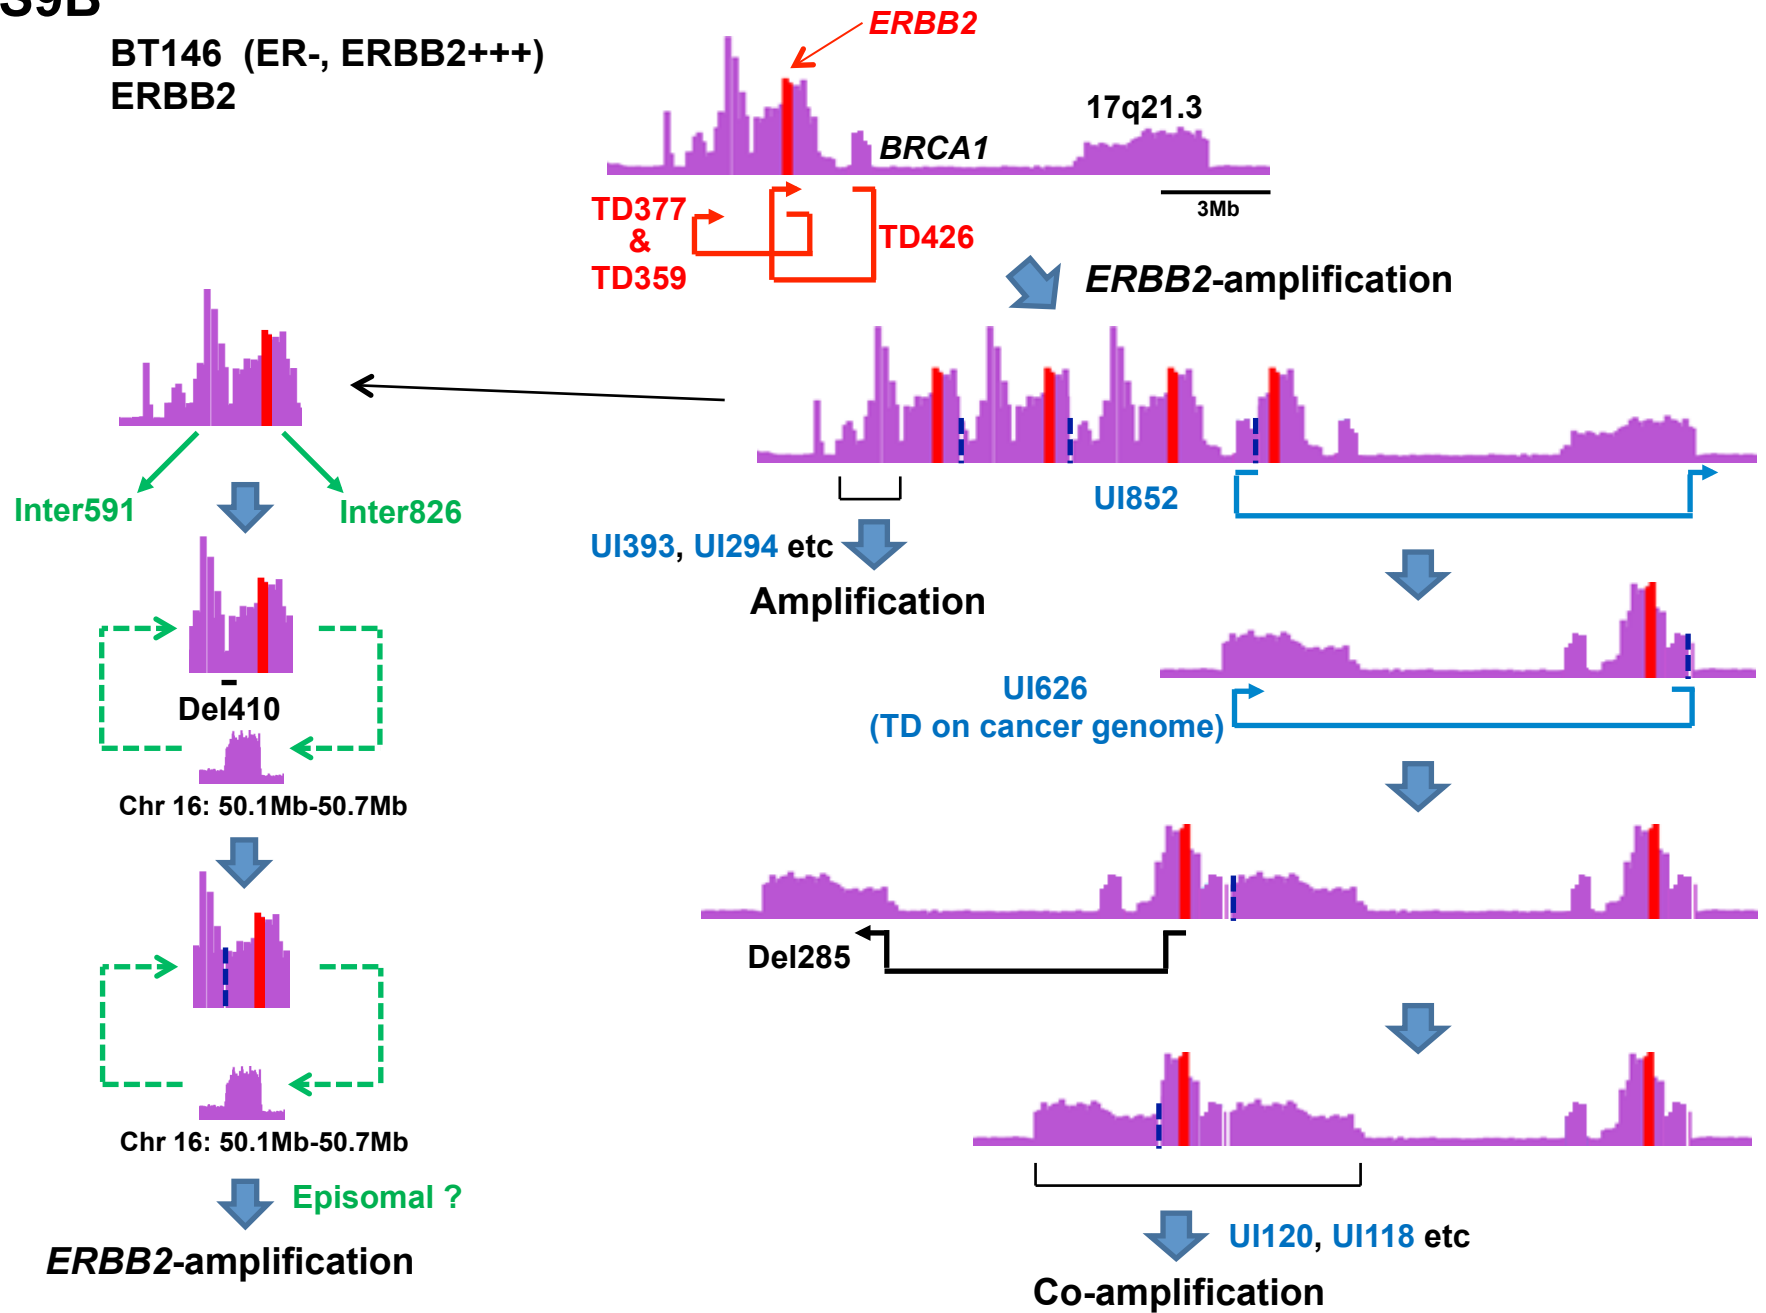

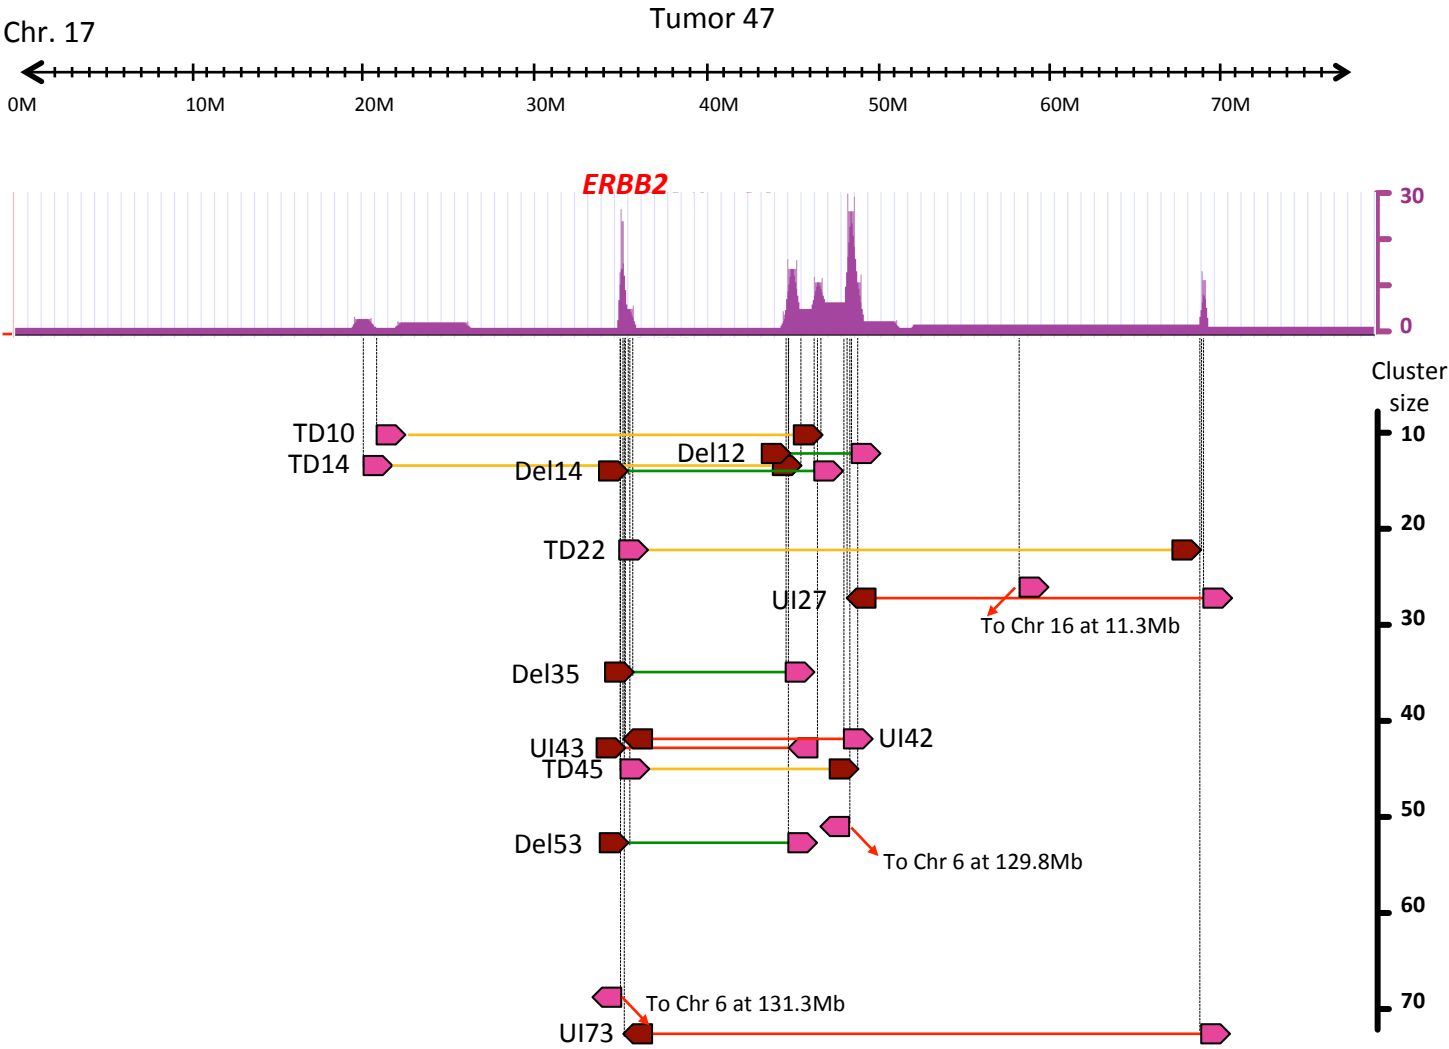

**BT47 (ER-, PR+, ERBB2+++)**  
*Luminal B*

S9D

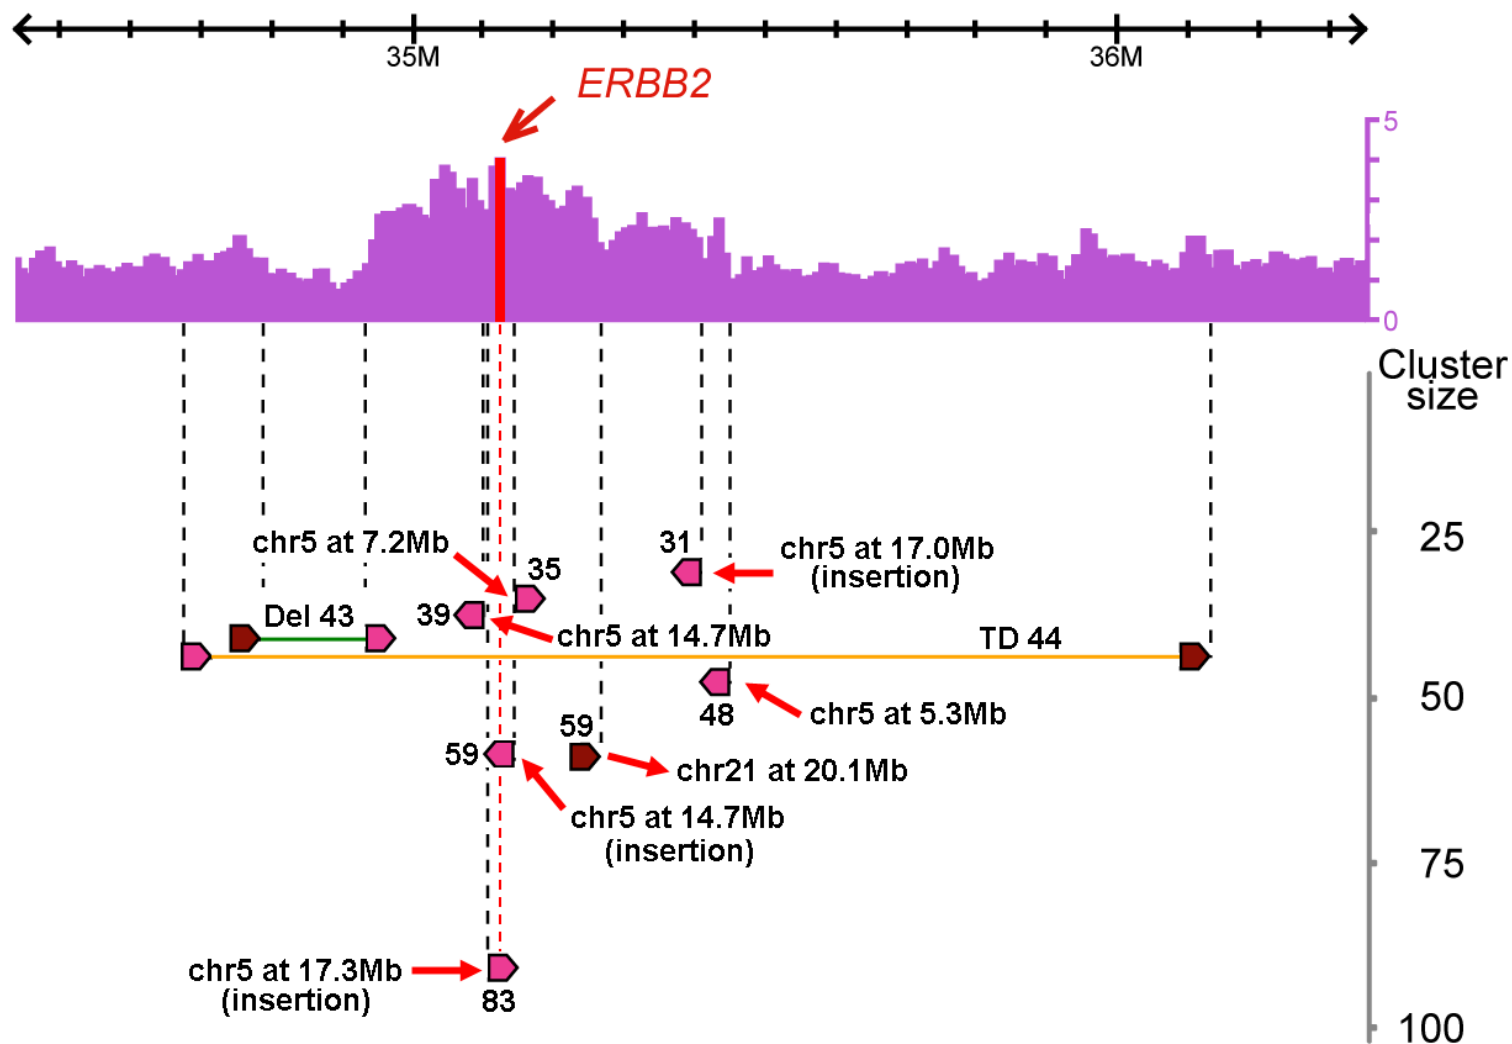

BT73 (ER+++, ERBB2+)  
Luminal B



**Supplemental Figure 9. Detailed structure of Chr 17 in three *ERBB2*-positive breast cancers**

(A) Copy number and structural variations on Chr 17 (8Mb-50Mb) for the BT146 sample. (B) Plausible mechanism of Chr17 structure of BT146. (C) Copy number and structural variations on Chr 17 in the BT47 sample, showing tandem duplications spanning *ERBB2* (TD45, TD22, TD14 and TD10), unpaired-inversions connecting *ERBB2* and 17q21.3 (UI42 and UI43), and deletions affecting *BRCA1* (Del12, Del35 and Del53). (D) Copy number and structural variations on Chr 17 (34.5Mb-36.3Mb) in the BT73 sample. Del, deletion; TD, tandem duplication; UI, unpaired-inversion; Inter-chromosomal translocations are indicated by arrows. The number associated with each structural variation corresponds to its cluster size. structural variations are depicted as in Supplemental Fig. 5.

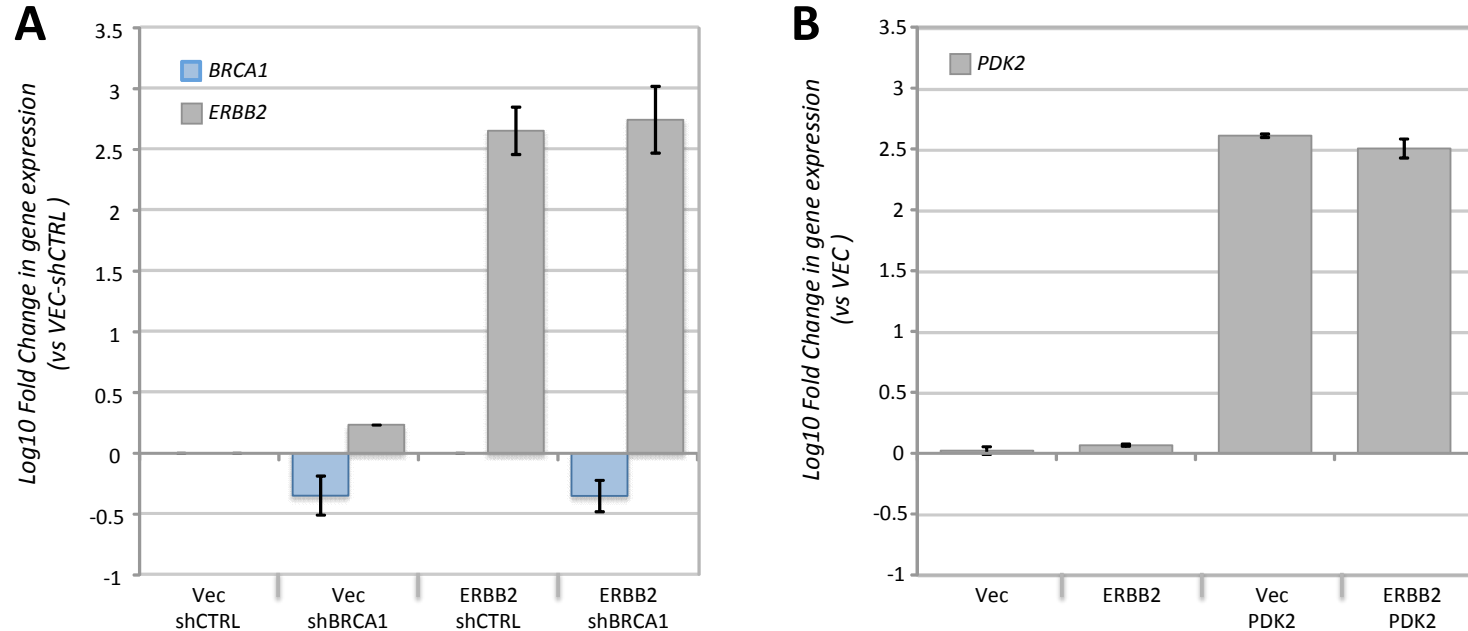

**Supplemental Figure 10. Fold changes in gene expression assessed by Real Time PCR.**

(A) Real Time PCR analysis of *BRCA1* and *ERBB2* gene expression in human mammary epithelial cells (HMECs) transduced with a combination of a scrambled shRNA (shCTRL) or an shRNA targeting the *BRCA1* mRNA (shBRCA1) and a mock vector (Vec) or a vector expressing the human *ERBB2* gene (ERBB2). The *ACTB* gene was used as housekeeping control. Bars correspond to averages of duplicate (for *BRCA1*) or triplicate (for *ERBB2*) experiments +/- standard deviations. (B) Real Time PCR analysis of *PDK2* gene expression in HMECs transduced with a combination of a mock vector (Vec) or a vector expressing the *ERBB2* gene (ERBB2) and a vector expressing the *PDK2* gene (PDK2). The *ACTB* gene was used as housekeeping control. Bars correspond to averages of duplicate experiments +/- standard deviations.

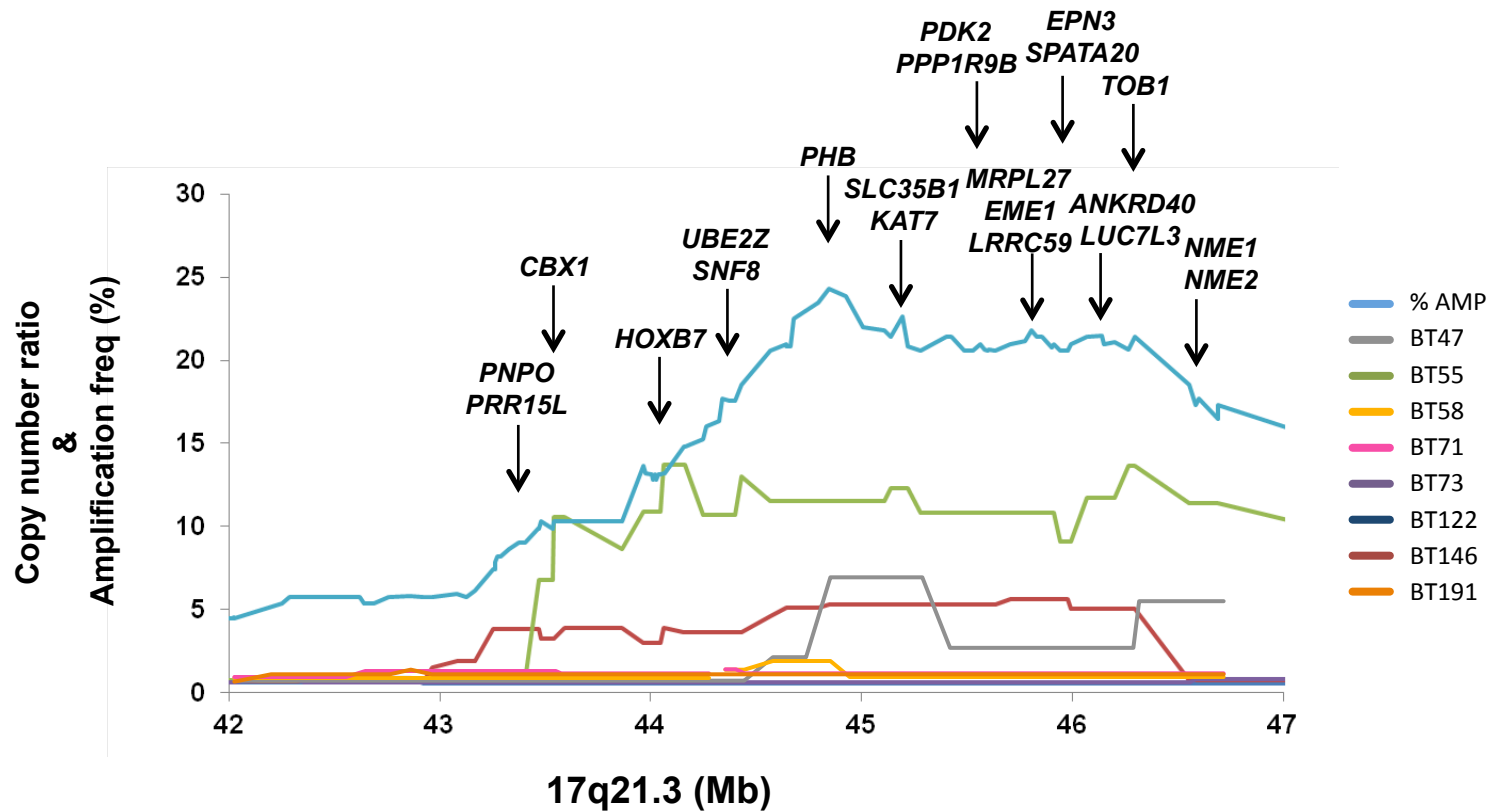

### Supplemental Figure 11. Putative oncogene cluster on 17q21.3

Copy number ratio for the eight tumor samples examined and frequency of copy number gain along the 17q21.3 locus, based on the Tumorscape breast cancer copy number data set. Oncogene candidates are indicated by arrows.

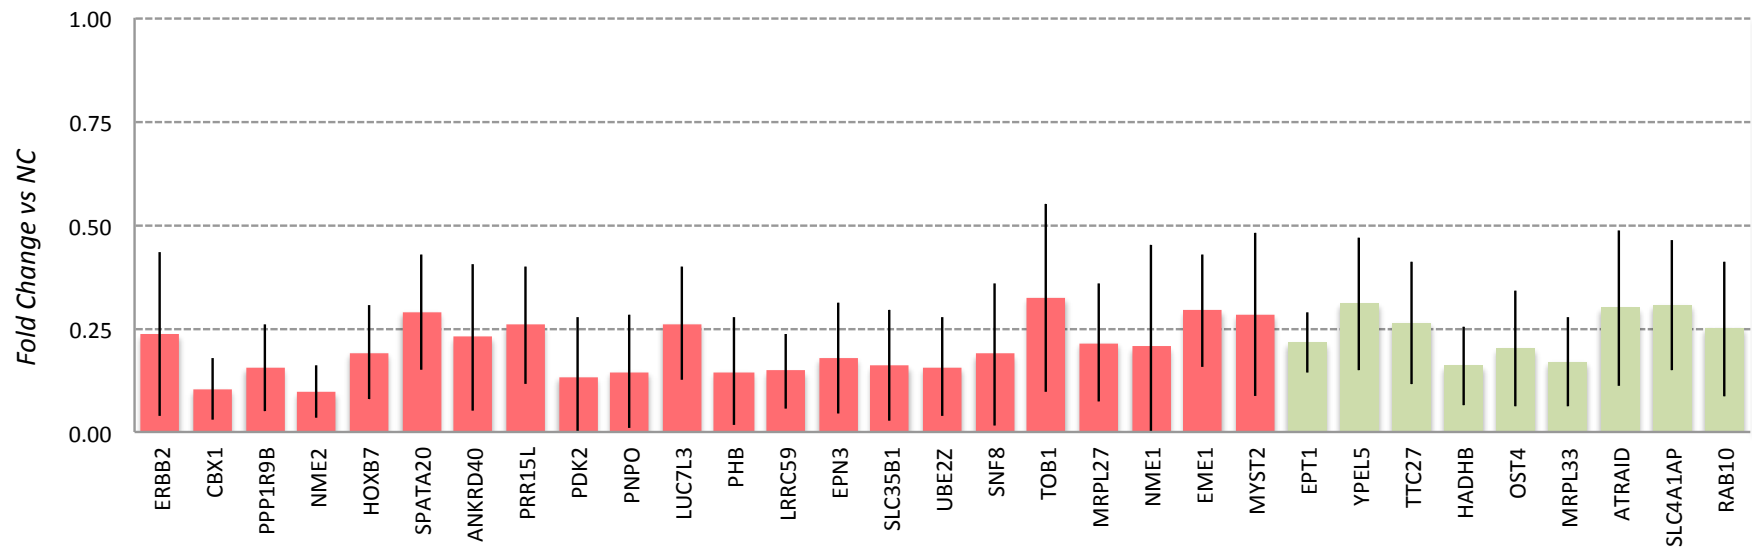

**Supplemental Figure 12. Fold changes in gene expression following siRNA treatment.**

Fold changes in gene expression values of siRNA targeted genes in the siRNA-treated cell lines relative to non-targeting siRNA treated cells (NC). The bars correspond to average values across the different cell lines examined with standard deviations represented by the error bars . Red, genes mapping to Chr 17, n=10 cell lines; green, genes mapping to Chr 2, n=6.

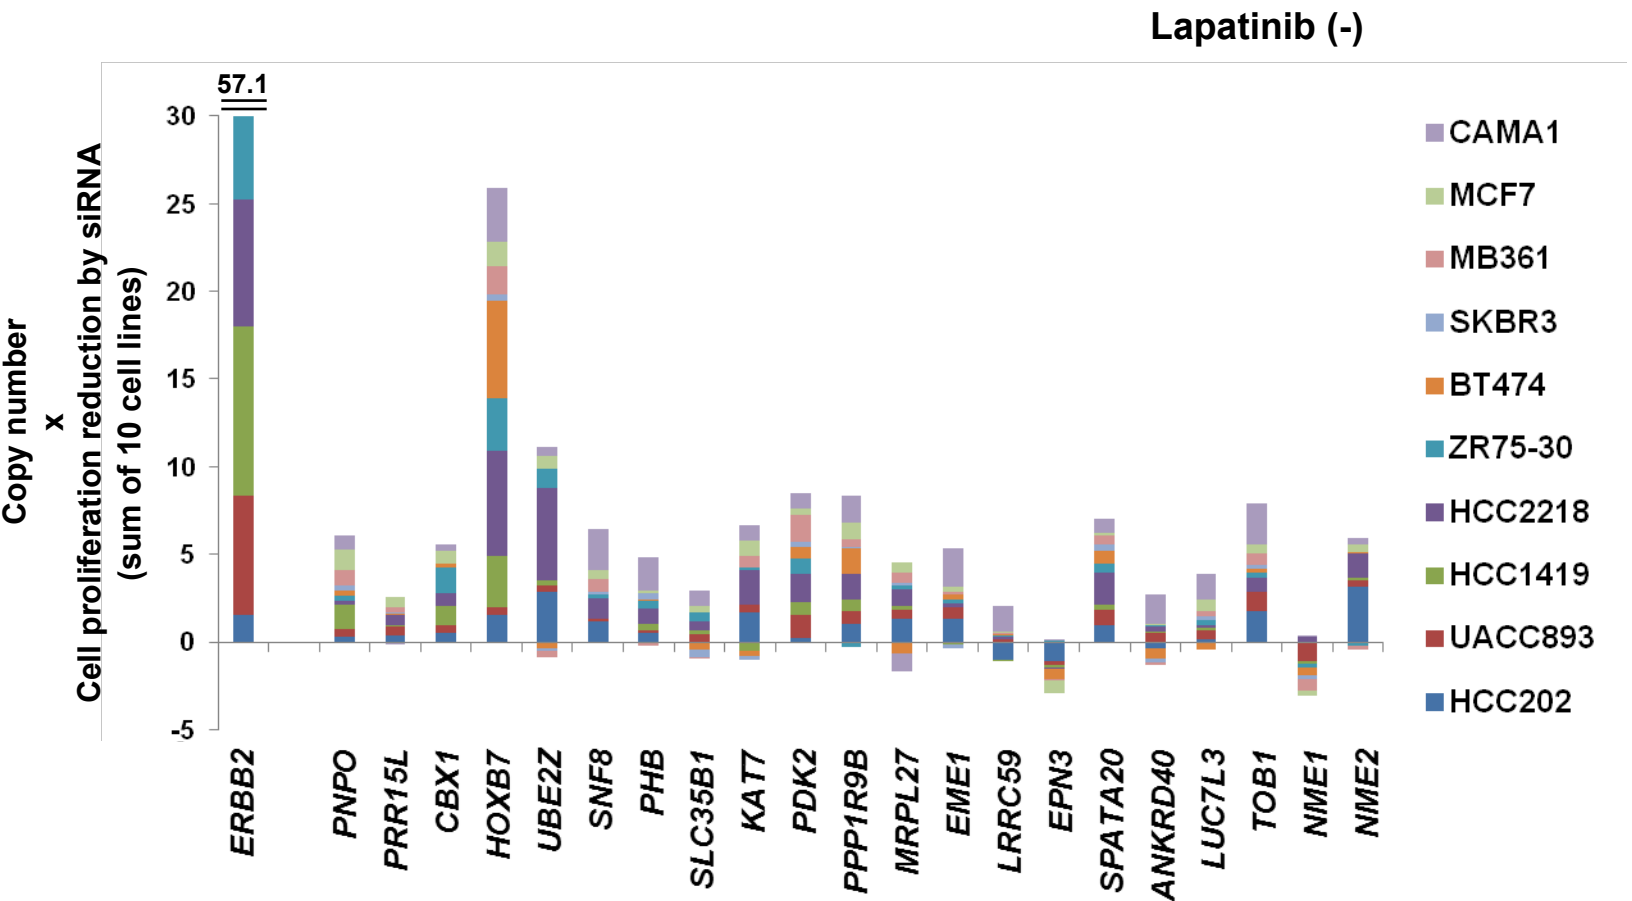

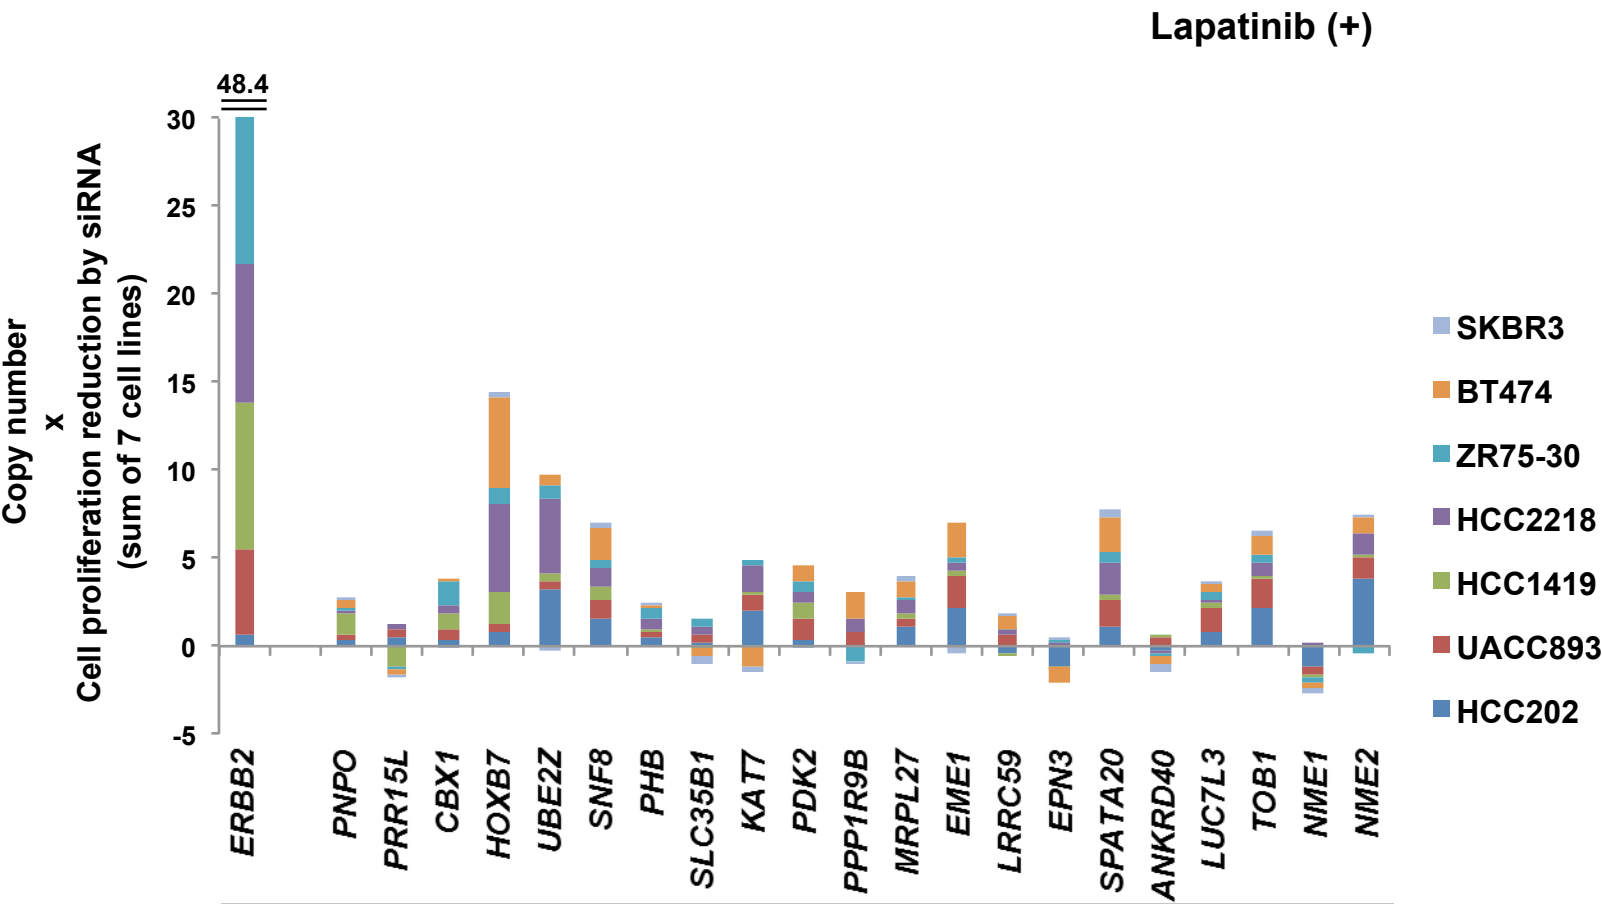

# S13C

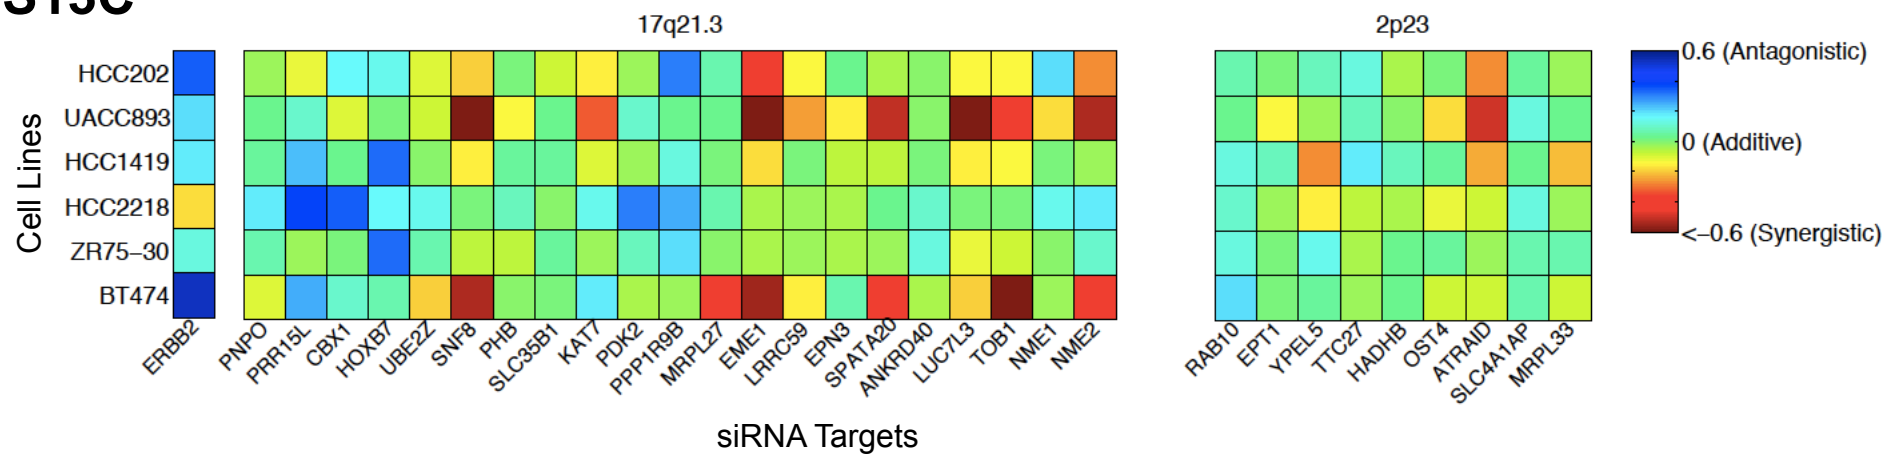

# S13D

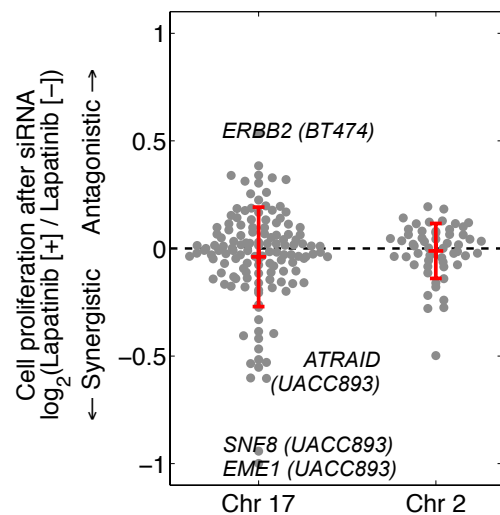

# S13E

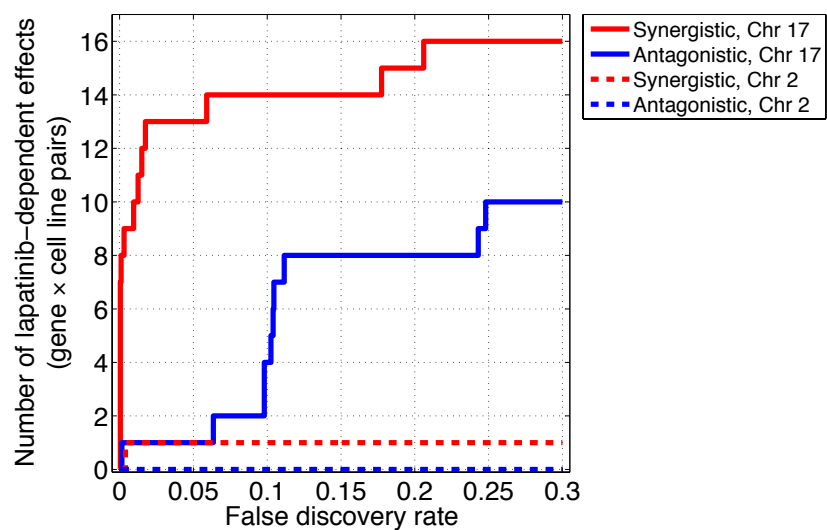

### Supplemental Figure 13. Functional consequences of Chr 17 structure of breast cancer

(A) Cell proliferation assay for 10 breast cancer cell lines treated with siRNAs against 17q21.3 candidate oncogenes and *ERBB2*. The reduction in cell proliferation following siRNA gene targeting is multiplied by the corresponding copy number in each cell line (copy number dependency). Results for the 10 cell lines are summed and shown in the bar chart. Gene symbols are ordered based on chromosomal location (lower coordinates on the left). (B) Cell proliferation assay for seven breast cancer cell lines treated with both siRNAs and Lapatinib (at the appropriate IC<sub>50</sub>). Copy number dependencies are shown as in (A). (C) Heatmaps showing the interactions between the pharmacological inhibition of *ERBB2* with Lapatinib and siRNA-mediated knockdown of genes on Chr 17q21.3 and Chr 2p23. Positive values (blue) indicate antagonistic effects on cell proliferation between the gene knockdown and Lapatinib, whereas negative values (red) indicate synergistic effects. Values are on a log<sub>2</sub> scale and represent the ratio of each siRNA's effect on cell proliferation with/without Lapatinib. Rows indicate cell lines and columns indicate genes targeted by siRNA. (D) Scatter plot showing values from heatmaps in (C). Each data point represents one cell line × gene pair. Error bars represent the mean ± standard deviation within each chromosome. Four example cell line × gene pairs are shown. (E) The number of significant Lapatinib-dependent effects (among cell line × gene pairs) that have synergistic or antagonistic interactions with Lapatinib as a function of the false discovery rate used to denote significance. At a 5% false discovery rate, the synergistic pairs on Chr17 are *EME1* (in BT474, HCC202, and UACC893 cells), *LUC7LC* (in UACC893 cell), *MRPL27* (in BT474 cell), and *NME2*, *SNF8*, *SPATA20*, and *TOB1* (in BT474 and UACC893 cells), whereas the antagonistic pair on Chr17 is *ERBB2* (in BT474 cell). The synergistic pair on Chr 2p23 is *ATRAID* (in UACC893 cell). At 5% false discovery rate, 17q21.3 is significantly enriched (hypergeometric test,  $P = 7.14E-07$ ) for Lapatinib-dependent cell line × gene pairs compared to 2p23 (counting both synergistic and antagonistic effects together). Considering only unique genes among the Lapatinib-dependent cell line × gene pairs, at a 5% false discovery rate, 17q21.3 (containing 8 unique genes) is still enriched for Lapatinib-dependent genes compared to Chr 2p23 (containing 1 unique gene) (hypergeometric test,  $P = 0.0059$ ).



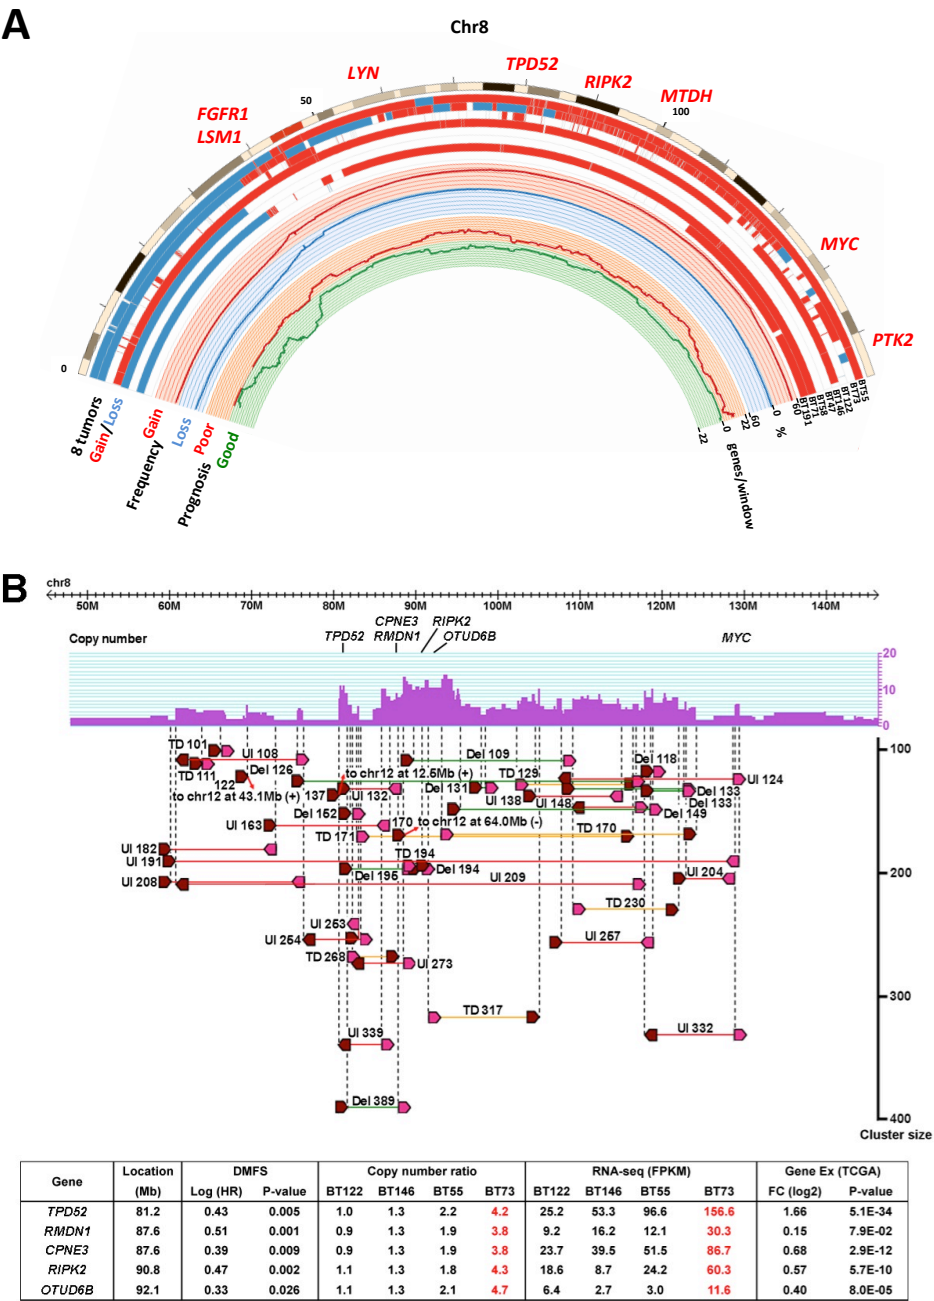

S14C

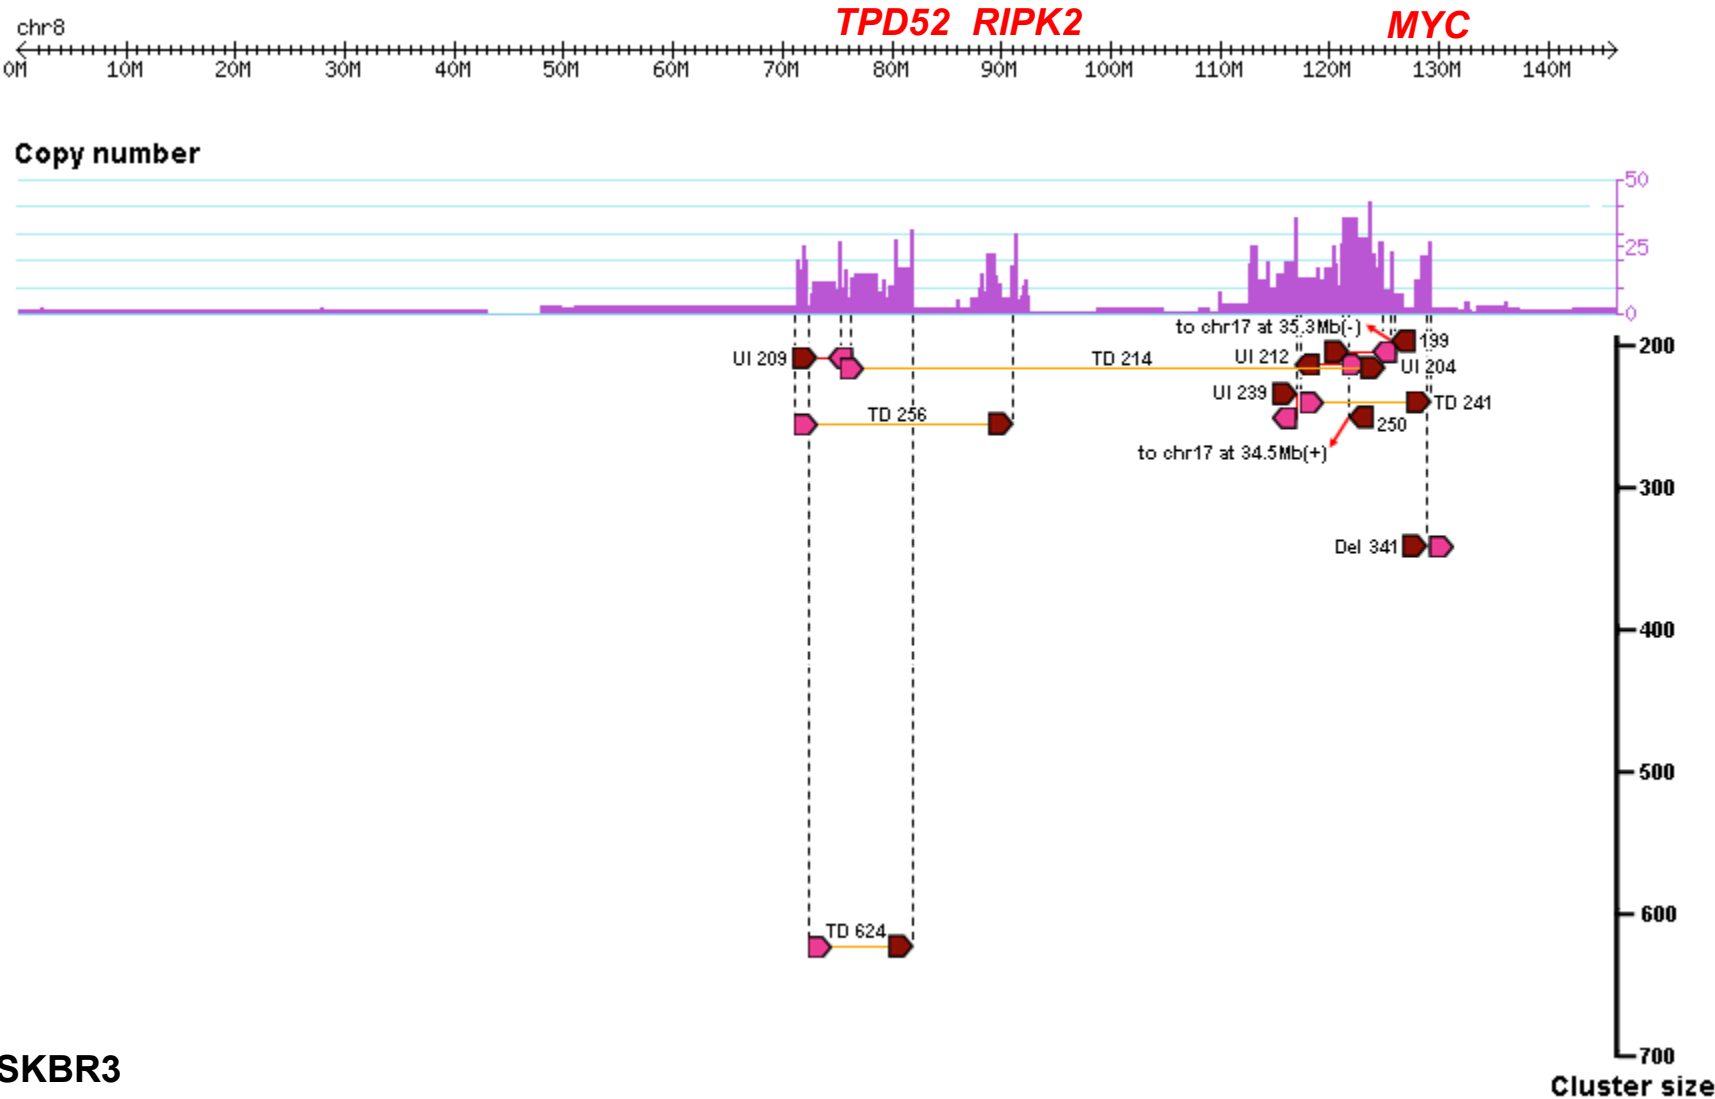

SKBR3

D

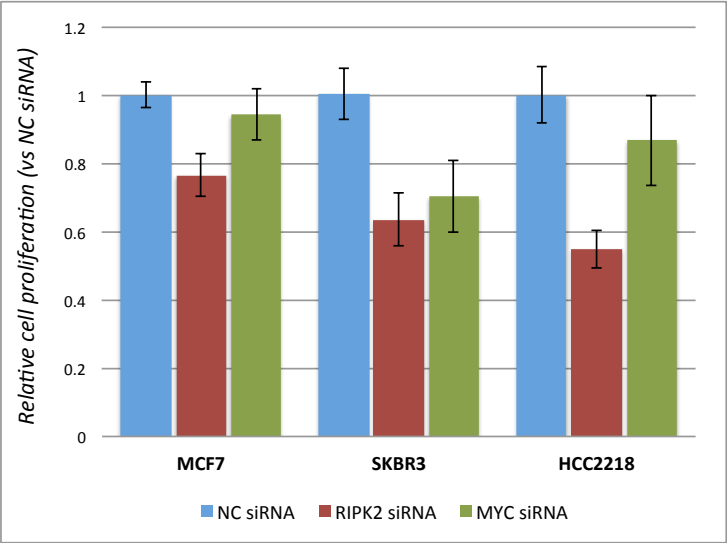

|         | RIPK2       |                     | MYC         |                     |
|---------|-------------|---------------------|-------------|---------------------|
|         | Copy number | Relative expression | Copy number | Relative expression |
| SKBR3   | 9.4         | 2.59                | 4.5         | 5.36                |
| MCF7    | 2.9         | 3.89                | 2.5         | 2.99                |
| HCC2218 | 2.6         | 3.08                | 3.4         | 5.37                |

E

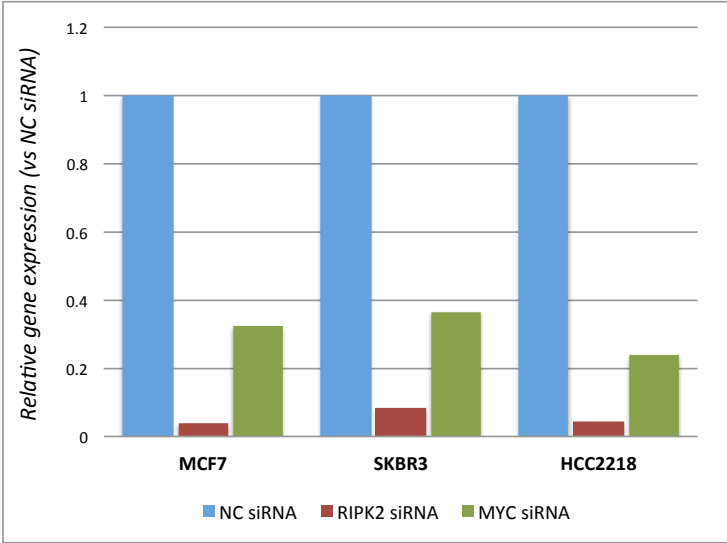

#### **Supplemental Figure 14. Structure and functional consequence of Chr 8 in breast cancer**

(A) Chromosomal map of Chr 8, showing copy number state of the eight breast tumors, the frequency of copy number gain and loss, and the number of genes associated with breast cancer prognosis. Clusters of poor and good prognosis associated genes are located in copy number gain (8q) and loss (8p) regions, respectively. (B) Copy number and structural variations relative to BT73, showing a complex structure caused by massive parallel rearrangements. Del, deletion. TD, tandem duplication. UI, unpaired inversion. Inter-chromosomal translocations are indicated by arrows. structural variations are depicted as in Supplemental Fig. 5. The lower panel reports chromosomal location, association of gene expression with disease metastasis free survival (DMFS) of breast cancer patients, copy number ratio (vs. normal control) and gene expression (FPKM by RNA-seq) in the four tumors for which RNAseq-based expression data is available, and fold changes in gene expression of tumor vs normal breast (TCGA data set) for five candidate genes on 8q. HR, hazard ratio. FC, fold change. (C) Copy number and structural mutations on Chr 8 for the SKBR3 breast cancer cell line. structural variations are depicted as in Supplemental Fig. 5. (D) Three different cell lines were transfected with 2-pmol of siRNAs targeting either the *RIPK2* or the *MYC* genes. Five days after transfection, the siRNA effect on cell proliferation was measured using the WST-1 assay. Averages +/- standard deviations of two sets of triplicates from two independent experiments are shown in the bar plot. NC, negative control. Copy number and gene expression level (relative to the *ACTB* gene, assessed by qPCR) for the *RIPK2* and *MYC* genes in the three cell lines examined are reported in the table. (E) Relative level of target gene expression in cells treated with siRNAs against either the *RIPK2* or the *MYC* genes (as shown in (D)), as measured by real time PCR. The *ACTB* gene was used as housekeeping control.

# Supplemental Results

## Structure of Chr 12p in BT122

In the triple-negative breast cancer BT122, the *CDK4* locus on Chr 12 shows a narrow and high peak of amplification (copy number ~34, Supplemental Figs. S6A and B). Intriguingly, this *CDK4* amplification and overexpression co-exists with a lesser degree of amplification and overexpression of the *KRAS* and *CCND2* oncogenes on Chr 12p (copy number ~6) (Supplemental Fig. S6B). Since *CCND2* is the activator of *CDK4* (Musgrove et al. 2011), this represents a co-gain of two members of the same oncogenic complex. Analysis of the precise boundaries of the *CDK4* amplicon allowed for a detailed reconstruction of the amplification process. We posit that the first structural variation is a ~21.7 Mb tandem duplication encompassing the *CDK4* locus (Supplemental Fig. S6C), which was followed by an unpaired inversion (UI764) that generated another copy of *CDK4*. This locus was further amplified by a smaller rearrangement (UI506 corresponding to a tandem duplication in the cancer genome). Such progressive internal “folding” generated high copy numbers for the *CDK4* locus (34 copies), but lower at the edges of the amplicon (6 copies). Subsequently, a copy number increase of the *KRAS* and *CCND2* genes occurs via Chr 12p aneuploidy. A plausible reconstruction can be hypothesized in which Chr 12p and the associated remnant 12q join the *CDK4* amplicon and generate a rearranged Chr 12, which is then subjected to chromosomal copy number increase to a final number of six copies (Supplemental Fig. S6C).

## Structure of Chr 8 and its functional consequences in breast cancer

In the luminal B breast cancer BT73, the most prominent genomic change is the amplification of Chr 8q, which appears to result from the accumulation of smaller amplicons generated by a multitude of overlapping tandem duplications and unpaired inversions (Supplemental Figs. 14A and B). Though *MYC* is the validated and most well known oncogene on 8q, it localizes at the edge of the region of copy number increase and is clearly less amplified than other centromeric loci. Based on copy number frequencies from the 1,174 breast cancer data set, *MYC* is located at the telomeric end of a very broad 8q amplicon, which extends from the centromere to near the telomere (Supplemental Fig. 14A). This suggested that perhaps other oncogenes exist on 8q that might be as important as *MYC* in breast cancer. In BT73, five genes show greater copy number than *MYC*, high gene expression, and association with poor prognosis in breast cancer patients: *TPD52*, *RMDN1*, *CPNE3*, *RIPK2*, and *OTUD6B* (Supplemental Fig. 14A). DNA-PET-based analysis of the breast cancer cell line SKBR3, which also harbors an amplification of 8q, showed a tandem duplication-driven amplification pattern on 8q, which includes massive co-amplification of *TPD52* (13.2 copies), *RIPK2* (13.2 copies), and *MYC* (16.6 copies) (Supplemental Fig. 14C). *TPD52* has been reported as an oncogene in breast cancer (Shehata et al. 2008). *RIPK2* is a kinase with a CARD domain and a component of the canonical NF- $\kappa$ B activating pathway by TNF (Inohara et al. 1998; McCarthy et al. 1998; Thome et al. 1998) and is frequently amplified in the breast cancer (38% of breast cancer samples in the Tumorscape data set). The NF- $\kappa$ B pathway is known to be highly activated in a wide variety of cancers and involved in cell proliferation (Chaturvedi et al. 2011; Perkins 2012), as well as *MYC* signaling in breast cancer (Yeh et al. 2011). We examined the action of *RIPK2* by using siRNA in 3 breast cancer cell lines, which show copy number gain of *RIPK2* (SKBR3, MCF7, and HCC2218), and found that *RIPK2* silencing significantly decreases cell proliferation (by 53%, 42%, and 40%, respectively), confirming its oncogenic role in breast cancer (Supplemental Figs. 14D and E). Based on the Tumorscape copy number data set, *TPD52*, *RIPK2*, and *MYC* are frequently amplified (34.7%, 38.0%, and 45.9%, respectively) and significantly co-amplified (29.8%,  $P = 2.62E-30$ ). These results indicate that the co-amplification of functional oncogenes, *TPD52*, *RIPK2*, and *MYC*, frequently observed among breast cancers, is likely to confer selective advantage in the cancer cells over single oncogene overexpression.

# Supplemental Methods

## DNA-PET library construction and sequencing

Construction of DNA-PET libraries has been described elsewhere (Hillmer et al. 2011). In brief, genomic DNA was hydrosheared and long mate pair (LMP) CAP adaptors with only a single 5' phosphorylated end were ligated, thus creating a nick on each strand after circularization of the DNA. Both nicks were translated >50bp into the circularized genomic DNA fragment by DNA polymerase I, and mate-pair reads of >50bp were released by T7 exonuclease and S1 nuclease. SOLiD sequencing adaptors P1 and P2 were ligated to the library DNA and constructs were then amplified by PCR and sequenced by 2x50bp using the Applied Biosystems SOLiD 3 Plus System for BT55, BT122, and BT146 and SOLiD 4 System for the BT73 sample. Sequence data was mapped in color space to the human reference genome hg18 using BioScope (Applied Biosystems), allowing up to 6 color code mismatches. Data has been processed as described in the Supplemental Methods.

## Illumina Nextera mate pair library preparation and sequencing

Mate pair genomic libraries were generated using the Illumina Nextera Mate Pair library preparation method (Illumina, San Diego, CA) with a gel-based size selection step to optimize the genomic fragment size around 7-9 kb. Genomic DNA was treated with a Tagment enzyme which randomly breaks the DNA and adds a biotinylated junction adapter to each end. After gel size selection and circularization, the DNA was fragmented to 400-2,000 bp fragment size using Covaris Adaptive Focused Acoustic technology (Covaris E220, Covaris, Woburn, MA) and the junction fragments from the ends of the 7-9 kb genomic fragments were captured using streptavidin beads (Life Technologies, Grand Island, NY). Standard Illumina TruSeq library preparation was performed on the fragments resulting in a library of genomic DNA junction fragments with Illumina Paired End oligonucleotide adapters ligated at each end. The libraries were amplified by PCR to obtain optimal products for high-quality paired end sequencing on a HiSeq 2500 instrument. Each mate-pair library was sequenced by multiplexing 8 indexed samples on 8 High Output lanes. The fastq files from the mate-pair library sequencing were paired and run through the NGSQCToolkit (v2.3, IlluQC\_PRLL.pl) with a quality control cutoff of 30 (-s 30). The filtered data was then aligned to the human reference genome (NCBI Build 37 from the 1000 genomes project) using bwa (v0.7.4) using default parameters (bwa mem) and the result was stored as bam files.

## Determination of copy number by DNA-PET

Copy number profiles for the eight breast cancer samples were generated using concordant mat-pair read data as described before (Hillmer et al. 2011). In the current analysis, somatic copy number ratios were calculated as the ratio of GC bias- and sequencing depth-normalized concordant mate-pair reads from the cancer libraries *versus* those from their matched normal libraries in consecutive 10 Kbps windows. Windows with the lowest 1% count of normal concordant mate-pair reads were filtered out as these tend to give spurious copy number predictions. Copy number segments were obtained by smoothing copy number ratios across 10Kb windows using the R package DNACopy. The mode of the density profile of the segmented copy number ratios in 10kb windows was used to normalize the copy number ratio data based on the assumption that the mode represents the normal copy number state. Thresholds for copy number gain and loss were then selected using minimum points on the density profile to the right and left of the mode respectively. Focal copy number variations were defined as copy number segments which affect less than half of the chromosomal arm where they occur.

**Discovery of recurrent cancer structural variations**

We compared structural variations across the eight breast tumors analyzed in this study to identify recurrent events. We searched for discordant mate pair read clusters, which we defined as events with more than 50% sequence overlap between the two breakpoint boundaries (with the exception of inter-chromosomal translocations, for which no sequence overlap was requested) and whose breakpoints map within 3 Mbps of each other but more than a minimum distance apart, to avoid the identification of possible recurrent germline events which had been mistakenly classified as somatic. This minimum distance was set as the 5th percentile of the span distribution of each type of somatic structural variation across the eight sequenced cancer samples and equals to 8.2 Kbps for deletions, 42.5.8 Kbps for tandem duplications, and 5.4 Kbps for inverted orientations.

**SOLiD RNA-seq**

Approximate 500 ng of poly(A) RNA was enriched using  $\mu$ MACS™ mRNA Isolation Kit. Random fragmentation of the enriched mRNA was carried out with RNase III (SOLiD™ Total RNA-Seq Kit), followed by purification of the fragmented mRNA using RiboMinus™ Concentration Module (Invitrogen). Evaluation of the mRNA yield and size distribution was done using Agilent® 2100 Bioanalyzer RNA 6000 Pico Chip Kit. After ligation of SOLiD adapter and reverse transcription (SOLiD™ Total RNA-seq Kit), purification of the cDNA was done using MinElute® PCR Purification Kit (Qiagen). 150-250bp of cDNA was excised from Novex® pre-cast gel (Invitrogen), and the adapter-ligated cDNA template was amplified by 15 PCR cycles (SOLiD™ Total RNA-seq Kit), followed by purification using PureLink™ PCR (Micro Kit, Invitrogen). The final yield and size distribution of the adapter-ligated and PCR-amplified DNA templates were assessed using Agilent 2100 Bioanalyzer with the DNA1000 Kit (Agilent). The SOLiD RNA-sequencing was carried out using SOLiD 4 system and reagents, and obtained reads are 50 bp length. RNA-seq reads were aligned to the reference human genome hg18 assembly using BioScope v1.3.1. FPKM values for each transcript were derived using Cufflinks (v2.0.0).

**Microarray-based gene expression**

Total RNA from the tumors was hybridized on human whole-transcript microarrays (Human Gene ST 1.0, Affymetrix), according to the manufacturer’s instructions at the microarray core lab unit at the National Institute of Genomic Medicine in Mexico City. Gene expression estimates were obtained from raw CEL files using the Affy package implemented in R.

**Breast cancer copy number data set**

Copy number data from a total of 1,174 breast cancer samples were collected by joining two independent sources: The Tumorscape breast cancer data set (240 cancer samples, Beroukhim et al. 2010) and the TCGA breast cancer data set (934 cancer samples, The Cancer Genome Atlas Network, 2012). Copy number calls were downloaded from the Tumorscape portal (<http://www.broadinstitute.org/tumorscape/pages/portalHome.jsf>) and the cBioPortal for Cancer Genomics Website (Cerami et al. 2012), respectively. Gene-centric frequencies of copy number changes, corresponding to the percentage of samples affected by copy number gain ( $\log_2$  copy number ratio Tumor vs. Normal  $> 0.3$ ) and copy number loss ( $< (-0.3)$ ), were computed for a total of 18,026 genes.

**TCGA gene expression data set**

Gene-based levels of gene expression using AgilentG4502A\_07 platform and corresponding to a total of 395 breast cancer samples and 61 normal breast samples were downloaded from The Cancer Genome Atlas Data Portal (<https://tcga-data.nci.nih.gov/tcga/>).

**Breast cancer patients prognosis data set**

Gene expression data and patients’ clinical data were obtained from 3 breast cancer cohorts comprising a total of 624 breast cancer samples (Miller et al. 2005; Pawitan et al. 2005; Loi et al. 2007). Gene expression was discretized into {0,1}: 1 for above mean and 0 for below mean. Cox Proportional Hazards regression was performed between the distant metastasis free survival (DMFS) and the discretized gene expression using the R function CoxPH and hazards ratio (HR) was obtained from the model. Wald test was conducted to obtain P-value of the survival association, probability of hazards ratio being hazards being equal i.e. HR = 1.

**Cancer gene lists**

Lists of genes which are differentially activated in human cancer were obtained from The Cancer Gene Census (Futreal et al. 2004), downloaded from the Sanger Cancer Genome Project website. As described in Supek et al.(2014), tumor suppressor genes were defined as genes marked as “Rec” in the “Cancer Molecular Genetics” column, whereas oncogenes as the genes marked as “Dom”. Oncogenes were further subdivided into their different mechanisms of activation based on the “Mutation Type” column.

**List of genes frequently spanned by tandem duplications.**

We combined a data set of tandem duplication coordinates as detected in a collection of 96 breast cancer genomes (Stephens et al., 2009; Hillmer et al., 2011; Natrajan et al., 2012; Nik-Zainal et al., 2012; Yang et al., 2013). A list of genes mapping to regions spanned by a tandem duplication was generated by intersecting gene bodies’ coordinates with tandem duplication coordinates, and requiring the overlap to span 100% of each gene feature. A list of genes that are frequently spanned by tandem duplications was generated by setting a gene count threshold equal to the 99<sup>th</sup> percentile of a cumulative distribution of gene recurrence generated by combining 100 independent random gene samplings of size equal to the total number of genes which are entirely spanned by at least one tandem duplication. Based on this evaluation, 2,587 unique genes are recurrently spanned by tandem duplications ( $> 17$  times across 96 genomes).



### Significance of siRNA effects

All siRNA effects were evaluated using  $\log_2(A/B)$ , where  $A = (\text{Cell proliferation with Lapatinib} + \text{siRNA for target gene}) / (\text{Cell proliferation with Lapatinib} + \text{control siRNA})$ , and  $B = (\text{Cell proliferation with siRNA for target gene}) / (\text{Cell proliferation with control siRNA})$ . We assumed the observed values on Chr 2p23 represented the expected background distribution of siRNA effects in the tested cell lines. Therefore, probabilities,  $p$ , were used to assigned to each observed siRNA effect value on Chrs 17 and 2p23 using the cumulative distribution function of a normal probability distribution fit to the mean and standard deviation values from Chr 2p23 (using the *normcdf* function in MATLAB). The  $\log_2$  values from all cell line  $\times$  gene pairs on Chr 2p23 were consistent with a normal distribution (Kolmogorov-Smirnov test,  $p=0.32$ , using the *kstest* function in MATLAB). Synergistic effects were quantified using  $p$ , whereas antagonistic effects were quantified using  $1-p$ . Probabilities were calculated for each Chr (17 and 2p23) separately, providing for four total sets of p-values ( $p$  and  $1-p$  on Chr 17;  $p$  and  $1-p$  on Chr 2). False discovery rates were estimated for each set of p-values separately (using the Benjamini and Hochberg method with the *mafdr* function in MATLAB).

The significance of enrichment for Lapatinib-dependent interactions on Chr 17 compared to Chr 2p23 was quantified using the hypergeometric distribution (using the *hygepdf* function in MATLAB). At a 5% false discovery rate, there were 14 Lapatinib-dependent cell line  $\times$  gene pairs on Chr 17 (13 synergistic and 1 antagonistic), and there was one synergistic Lapatinib-dependent pair on Chr 2p23. There were 54 cell line  $\times$  gene pairs on Chr 2p23 (6 cell lines  $\times$  9 genes) and 132 pairs on Chr 17 (6 cell lines  $\times$  22 genes) in total, implying that 1/54 pairs on Chr 2p23 and 14/132 pairs on Chr 17 were Lapatinib-dependent. If we assume there are 20,000 genes genome-wide, and that the observed values on Chr 2p23 represent the expected background distribution of siRNA effects in the tested cell lines, then the hypergeometric distribution has population size 6 cell lines  $\times$  20,000 genes = 120,000 pairs with 1/54 of all pairs expected to be Lapatinib-dependent. The p-value was determined by calculating the likelihood of observing  $n$  or more pairs on Chr 17 ( $n = 14$  with ERBB2,  $n = 13$  without ERBB2). An analogous calculation can be made for unique genes, whereby the hypergeometric distribution has a population size of only 20,000 genes with 1/9 of all genes expected to be Lapatinib-dependent. The p-value was determined by calculating the likelihood of observing  $n$  or more genes on Chr 17 ( $n = 8$  with ERBB2,  $n = 7$  without ERBB2). Similar calculations can be done using the binomial distribution, which assumes sampling with replacement, which is not accurate in our case, but does not require an estimate of the total population size (a population size of 20,000 genes was assumed for the hypergeometric distribution). At a 5% false discovery rate, Chr 17 was significantly enriched for Lapatinib-dependent pairs whether ERBB2 was included in the analysis ( $P = 1.97\text{E-}07$ , using the *binopdf* function in MATLAB) or excluded ( $P = 7.32\text{E-}07$ ). These p-values are very similar to those calculated from the hypergeometric distribution.

### PCR validations for structural mutations and fusion genes

To determine the genomic break points of structural mutations, PCR was carried out using the proof reading DNA Polymerase Phusion Flash (Thermo Scientific) and 1 ng of tumor genomic DNA as template in a 10  $\mu\text{l}$  reaction. A second nested PCR was performed, when necessary, using 1.6  $\mu\text{l}$  of the amplification product of the first PCR as a template for a 40  $\mu\text{l}$  PCR reaction. PCR fragments were cloned using StrataClone Blunt PCR cloning kit (Stratagene) and sequenced using standard Sanger sequencing technologies. To test for the expression of fusion genes, 500 ng of total RNA were reverse transcribed using a Maxima First strand cDNA synthesis kit (Fermentas). A PCR was carried out with HotStarTaq (Qiagen) and 5 ng of cDNA as a template. PCR fragments were cloned and sequenced as above.

Real-time PCR

Total RNA was extracted using RNAeasy Mini Kit (Qiagen) according to the manufacturer’s protocol. Up to 500 ng of RNA was reverse transcribed using Maxima reverse transcriptase mix (Fermentas). Real-time PCR was performed using 1 ng of cDNA, 0.5 µM forward and reverse primers and SYBR-Green PCR Mix (Fermentas) using the ABI7500 system (ABI). The *ACTB* gene was used as housekeeping control. Primer sequences are listed below.

|                 | F-primer                  | R-primer                |
|-----------------|---------------------------|-------------------------|
| <i>ACTB</i> (1) | GTCACGCACGATTTCGCCGT      | AGACCTTCAACACCCAGCC     |
| <i>ACTB</i> (2) | TCCCTGGAGAAGAGCTACGA      | AGGAAGGAAGGCTGGAAGAG    |
| <i>ANKRD40</i>  | TTGCTGTGAGCTGGGTGTTA      | TCCTGGAAATCTTGAGTCG     |
| <i>ATRAID</i>   | AAAACGACACGAGAGCTAATGC    | CAGGGTCTCCAGAGAACAG     |
| <i>BRCA1</i>    | GAGTGTCCCATCTGTCTGGAGTTGA | AGGACACTGTGAAGGCCCTTTCT |
| <i>CBX1</i>     | GGAGCGGATTATTGGAGCTA      | ACCAGGTCAGCCTCATCAGA    |
| <i>EME1</i>     | AACCGAGTCAGCCTGGAAAT      | ACCTGTATGTCTGCGAGCAA    |
| <i>EPN3</i>     | CAACCTTGACTCGTTGGTCA      | GGTGCGCATCTGGTTTAGC     |
| <i>EPT1</i>     | TTTTACTCTGCCCCACATCC      | CTGAGATCCCACGTCTGTCA    |
| <i>ERBB2</i>    | AGCAGGGCTTCTTCTGTCC       | CTCCTCTTCAGAGGGCTCCA    |
| <i>HADHB</i>    | GGGCCATGCTATGATAGTGG      | GGCAAGGCTTAAGTGCAAAC    |
| <i>HOXB7</i>    | CAGAGGGACTCGGACTTGG       | TCTGGTAGCGGGGTGTAGGTC   |
| <i>KAT7</i>     | GACGATCTGCTCGAGTCACC      | GCTCCTCAGTGCCAAAAGAC    |
| <i>LRRCS9</i>   | GGGAGCAGGAGAAGAAACCT      | ACAGCCCAGGAACGAGTGT     |
| <i>LUC7L3</i>   | AGAAGATGCAGCAGGTCTCG      | GATCGATCATGGCTTCTGCT    |
| <i>MRPL27</i>   | TCATGCTGGGAACATCATTG      | CGGACTATCCCCTCTTCCAG    |
| <i>MRPL33</i>   | TGCGGGAAAACTGACTCTT       | TTCCATGCCATTTCTCTTC     |
| <i>MYC</i>      | TGCTCCATGAGGAGACACC       | ACTCTGACCTTTTGCCAGGA    |
| <i>NME1</i>     | AACCTGCGAGCTCCAAGC        | CAAGCCGATCTCCTTCTCTG    |
| <i>NME2</i>     | GTGAAGACAGGCCGAGTGAT      | TCACTGCCATGAATGATGTTT   |
| <i>OST4</i>     | TATCACTACGTGGCCGTCAA      | TACTGGGCCCTATTCAGTGG    |
| <i>PDK2</i>     | CTTCTCCATGGAAGGCTTTG      | CCTGGATGGTCTGGTAGTGG    |
| <i>PHB</i>      | GAGTCCATTGGCAAGTTTGG      | CACAATGTCCTGCACTCCAC    |
| <i>PNPO</i>     | GTGGTCAGCCACCAGAGTTC      | CCATCACCTGAGGGTACAGG    |
| <i>PPP1R9B</i>  | ATGGACAAGCTCCTGGACAA      | ACAGGGGAGGGAGGACAAT     |
| <i>PRR15L</i>   | CAGGCAGCTCCTACACTCAA      | GTCAGCTTCCACCAACCAAT    |
| <i>RAB10</i>    | ATCCTTCGAAAGACCCCTGT      | TAGTGGATGGCAACTGATGG    |
| <i>RIPK2</i>    | GGGATAGCACCATTTCTGGA      | GTTAAGGCAGGCTTCTGTCAT   |
| <i>SLC35B1</i>  | TTGGCCTCTGTGATCCTCTT      | TGGGATGTCTTCTTAGCTCCT   |
| <i>SLC4A1AP</i> | GCCAGCAGAGATTCCAGAAC      | CTCCTTTCATGGCACCAAAT    |
| <i>SNF8</i>     | CGGCACTTACCTCATTCAGT      | CCCATTTAAGACTGGCTTTG    |
| <i>SPATA20</i>  | TGATCTGTGGAGACCGTCAG      | CGGAGGGTACTCAGGAAAGG    |
| <i>TOB1</i>     | TGAAGGGCACTGGTATCCTG      | ATTGCCACGAACATCATCAA    |
| <i>TTC27</i>    | GACTCAATTTACGGGGCTTG      | TGATTTCGAAACTGGTTGCTT   |
| <i>UBE2Z</i>    | AGGGGTGATGGAGAAGTCCT      | CGCATCAAGAGGGACTGGTA    |
| <i>YPEL5</i>    | ACCCGTCTGTTTTCTGTGC       | GCATGACCCGATCTTGAAC     |

# Supplemental References

Cerami E, Gao J, Dogrusoz U, Gross BE, Sumer SO, Aksoy BA, Jacobsen A, Byrne CJ, Heuer ML, Larsson E, et al. 2012. The cBio cancer genomics portal: an open platform for exploring multidimensional cancer genomics data. *Cancer Discov* **2**: 401-4.

Chaturvedi MM, Sung B, Yadav VR, Kannappan R, Aggarwal BB. 2011. NF- $\kappa$ B addiction and its role in cancer: 'one size does not fit all'. *Oncogene* **30**: 1615-1630.

Futreal PA, Coin L, Marshall M, Down T, Hubbard T, Wooster R, Rahman N, Stratton MR. 2004. A census of human cancer genes. *Nat Rev Cancer*. **4**:177-83.

Inohara N, del Peso L, Koseki T, Chen S, Núñez G. 1998. RICK, a novel protein kinase containing a caspase recruitment domain, interacts with CLARP and regulates CD95-mediated apoptosis. *J Biol Chem* **273**: 12296-12300.

Konecny GE, Pegram MD, Venkatesan N, Finn R, Yang G, Rahmeh M, Untch M, Rusnak DW, Spehar G, Mullin RJ, et al. 2006. Activity of the dual kinase inhibitor Lapatinib (GW572016) against HER-2-overexpressing and trastuzumab-treated breast cancer cells. *Cancer Res* **66**: 1630-1639.

McCarthy JV, Ni J, Dixit VM. 1998. RIP2 is a novel NF-kappaB-activating and cell death-inducing kinase. *J Biol Chem* **273**: 16968-16975.

Musgrove EA, Caldon CE, Barraclough J, Stone A, Sutherland RL. 2011. Cyclin D as a therapeutic target in cancer. *Nat Rev Cancer* **11**: 558-572.

Natrajan R, Mackay A, Lambros MB, Weigelt B, Wilkerson PM, Manie E, Grigoriadis A, A'hern R, van der Groep P, Kozarewa I, et al. 2012. A whole-genome massively parallel sequencing analysis of BRCA1 mutant oestrogen receptor-negative and -positive breast cancers. *J Pathol* **227**:29-41.

Perkins ND. 2012. The diverse and complex roles of NF- $\kappa$ B subunits in cancer. *Nat Rev Cancer* **12**: 121-132.

Shehata M, Bièche I, Boutros R, Weidenhofer J, Fanayan S, Spalding L, Zeps N, Byth K, Bright RK, Lidereau R, Byrne JA. 2008. Nonredundant functions for tumor protein D52-like proteins support specific targeting of TPD52. *Clin Cancer Res* **14**: 5050-5060.

Supek F, Miñana B, Valcárcel J, Gabaldón T, Lehner B. 2014. Synonymous mutations frequently act as driver mutations in human cancers. *Cell* **156**:1324-35.

Thome M, Hofmann K, Burns K, Martinon F, Bodmer JL, Mattmann C, Tschopp J. 1998. Identification of CARDIAK, a RIP-like kinase that associates with caspase-1. *Curr Biol* **8**: 885-888.

Yang L, Luquette LJ, Gehlenborg N, Xi R, Haseley PS, Hsieh CH, Zhang C, Ren X, Protopopov A, Chin L, Kucherlapati R, Lee C, Park PJ. 2013. Diverse mechanisms of somatic structural variations in human cancer genomes. *Cell*. **153**:919-29.

Yeh PY, Lu YS, Ou DL, Cheng AL. 2011. I $\kappa$ B kinases increase Myc protein stability and enhance progression of breast cancer cells. *Mol. Cancer* **10**: 53.
